1  
2  
3  
4  
5  
6  
7  
8  
9  
10  
11  
12  
13  
14  
15  
16  
17  
18  
19  
20  
21  
22  
23

The p97-UBXD8 complex modulates ER-Mitochondria contact sites by modulating membrane lipid saturation and composition

Rakesh Ganji<sup>1</sup>, Joao A. Paulo<sup>2</sup>, Yuecheng Xi<sup>3</sup>, Ian Kline<sup>3</sup>, Jiang Zhu<sup>4</sup>, Christoph S. Clemen<sup>5</sup>, Conrad C. Wehl<sup>4</sup>, John G. Purdy<sup>3</sup>, Steve P. Gygi<sup>2</sup>, and Malavika Raman<sup>1#</sup>

<sup>1</sup> Department of Developmental Molecular and Chemical Biology, Tufts University School of Medicine, Boston MA

<sup>2</sup> Department of Cell Biology Harvard Medical School, Boston MA

<sup>3</sup> Department of Immunobiology, BIO5 Institute, University of Arizona School College of Medicine, Tucson Arizona

<sup>4</sup> Department of Neurology, Washington University School of Medicine, Saint Louis, Missouri

<sup>5</sup> Institute of Aerospace Medicine, German Aerospace Center, Cologne, Germany; Center for Physiology and Pathophysiology, Institute of Vegetative Physiology, Medical Faculty, University of Cologne, Cologne, Germany.

# Address correspondence to Malavika Raman, [malavika.raman@tufts.edu](mailto:malavika.raman@tufts.edu)

24 **Abstract**

25           The intimate association between the endoplasmic reticulum (ER) and mitochondrial  
26 membranes at ER-mitochondria contact sites serves as a platform for several critical cellular  
27 processes, in particular lipid synthesis. Enzymes involved in lipid biosynthesis are enriched at  
28 contacts and membrane lipid composition at contacts is distinct relative to surrounding  
29 membranes. How contacts are remodeled and the subsequent biological consequences of altered  
30 contacts such as perturbed lipid metabolism remains poorly understood. Here we show that the  
31 p97 AAA-ATPase and its ER-tethered ubiquitin-X domain adaptor 8 (UBXD8) regulate the  
32 prevalence of ER-mitochondria contacts. The p97-UBXD8 complex localizes to contacts and loss  
33 of this complex increases contacts in a manner that is dependent on p97 catalytic activity.  
34 Quantitative proteomics of purified contacts demonstrates alterations in proteins regulating lipid  
35 metabolism upon loss of UBXD8. Furthermore, lipidomics studies indicate significant changes in  
36 distinct lipid species in UBXD8 knockout cells. We show that loss of p97-UBXD8 results in  
37 perturbed contacts due to an increase in membrane lipid saturation via SREBP1 and the lipid  
38 desaturase SCD1. Aberrant contacts in p97-UBXD8 loss of function cells can be rescued by  
39 supplementation with unsaturated fatty acids or overexpression of SCD1. Perturbation of contacts  
40 and inherent lipid synthesis is emerging as a hallmark to a variety of human disorders such as  
41 neurodegeneration. Notably, we find that the SREBP1-SCD1 pathway is negatively impacted in  
42 the brains of mice with p97 mutations that cause neurodegeneration. Our results suggest that  
43 contacts are exquisitely sensitive to alterations to membrane lipid composition and saturation in  
44 a manner that is dependent on p97-UBXD8.

45 **Main**

46 Contact sites between the ER and mitochondria allow for compartmentalization of biosynthetic  
47 reactions such as lipid synthesis, calcium transport and apoptosis among others<sup>1-3</sup>. ER-  
48 mitochondria contact sites (henceforth referred to as contacts unless specified otherwise) form  
49 when the membrane of these organelles come into close apposition (observed to be between 5  
50 – 100 nm) without fusion<sup>2,4</sup>. Contacts are stabilized by the interaction between tethering proteins  
51 that reside in opposing membranes; thus, the ability to regulate transient interactions between  
52 these tethers (through their abundance or post-translational modifications) enables the rapid  
53 formation and dissolution of contacts to meet cellular needs<sup>5-9</sup>.

54 Regulated protein degradation via the ubiquitin proteasome system is an efficient means to  
55 modulate contacts as numerous ubiquitin-reliant protein quality control mechanisms surrounding  
56 the ER and mitochondria can be co-opted to modulate the contact site proteome<sup>10,11</sup>. The p97  
57 AAA-ATPase is an abundant, evolutionarily conserved, ubiquitin-selective unfoldase that  
58 regulates multiple protein quality control pathways surrounding the ER and mitochondria. p97 is  
59 ideally positioned to regulate contacts by mediating the extraction and degradation of membrane-  
60 embedded tethers or contact resident proteins<sup>12-14</sup>. Importantly, specificity in p97-regulated  
61 pathways occurs via association with numerous adaptors that recruit p97 to specific  
62 substrates<sup>15,16</sup>. We isolated contacts (also known as mitochondria-associated membranes, MAM)  
63 from HEK-293T cells and probed for p97 and select adaptor proteins. Percoll gradient  
64 centrifugation of crude mitochondria releases associated ER membranes allowing for the  
65 purification of ER-mitochondria contacts<sup>17</sup>. Using a known contact site-enriched protein as a  
66 marker (fatty acid coenzyme A ligase 4, FAACL4) as well as markers for mitochondria (TOMM20)  
67 and ER (SEC61 $\beta$ ), we found that the ER-localized p97 adaptors UBXD8 and UBXD2 (but not  
68 cytosolic UBXN1) are enriched at contacts and that p97 is also present in these fractions (Fig.  
69 1a). To determine the role of p97 complexes at contacts we used a split luciferase reporter  
70 wherein the N-terminal fragment of luciferase is targeted to mitochondria and the C-terminal

71 fragment to the ER using established targeting sequences<sup>18</sup>. Functional luciferase activity is  
72 reconstituted when the two organelles establish close range contacts and luciferase activity can  
73 be measured using the substrate, Enduren. We verified the functionality of the reporter system in  
74 wildtype cells by over-expressing receptor accessory protein 1 (REEP1)<sup>18</sup>, a contact tether and  
75 found a robust increase in contacts (Supplementary Fig.1a). To determine what role if any p97-  
76 adaptor complexes may have at contacts, cells were transfected with split luciferase cDNAs and  
77 siRNAs and luminescence was measured. Loss of p97 and UBXD8 resulted in an increase in  
78 contacts, whereas depletion of UBXD2 or another p97 adaptor UBXD7 had no impact (Fig. 1b, c  
79 and Supplementary Fig.1b). Hence even though UBXD2 localizes to contacts it does not regulate  
80 them and we focus on the role of UBXD8 for the remainder of the study. To verify the specificity  
81 of the phenotype, we expressed wildtype p97 or UBXD8 siRNA-resistant cDNAs and were able  
82 to rescue the phenotype (Fig. 1b, c). However, individual ATP catalytic site mutants in p97 were  
83 unable to rescue (Fig. 1c). To assess the role of individual domains in UBXD8, we expressed  
84 point mutants in the ubiquitin associated (UBA) or ubiquitin-X (UBX) domains that serve to bind  
85 ubiquitin and p97 respectively, as well as deletion of the UAS domain that has been reported to  
86 mediate the oligomerization of UBXD8<sup>19</sup>. Loss of these functional domains in UBXD8 prevented  
87 rescue of increased contacts (Fig. 1b, Supplementary Fig. 1c). Two additional assays were used  
88 to verify the role of p97-UBXD8 in regulating contacts. We measured contacts by measuring the  
89 extent of co-localization between the ER and mitochondria by confocal microscopy  
90 (Supplementary Fig. 1d, e), and we performed transmission EM (TEM) studies in wildtype and  
91 UBXD8 knockout (KO) cells generated by CRISPR-Cas9 gene editing (Fig. 1d-f). UBXD8 KO  
92 cells had a significant increase in ER tubules closely apposed to mitochondria (Fig. 1e, f and  
93 Supplementary Fig. 1e). No defects in overall mitochondria number or morphology were apparent  
94 in UBXD8 KO cells (Supplementary Fig. 1f).

95

96 The p97-UBXD8 complex is critical for maintaining ER quality control by regulating ERAD and  
97 loss of this complex can cause ER stress due to deficits in ERAD<sup>20</sup>. To determine whether altered  
98 contacts observed upon depletion of p97-UBXD8 is due to increased ER stress, we treated cells  
99 with ER stressors tunicamycin and thapsigargin which cause protein misfolding in the ER.  
100 However, no impact on contacts was observed under these conditions (Supplementary Fig. 2a).  
101 Furthermore, we probed for the ER chaperone BiP which is induced upon ER stress and found  
102 no difference in BiP levels between wildtype and UBXD8 KO cells (Supplementary Fig.2b).  
103 Together with our findings suggest that the p97-UBXD8 complex has a novel role in regulating  
104 contacts independent of its role in ERAD.

105 To identify pathways altered in UBXD8 KO cells that may contribute to the contact site  
106 defect, we isolated contacts (MAMs) from triplicate wildtype and UBXD8 KO HEK-293T cells by  
107 biochemical fractionation and performed multiplexed, quantitative proteomics on the post-nuclear  
108 supernatant and MAM fractions using tandem mass tags (TMT) (Fig. 2a, b and Supplementary  
109 Fig. 3a-f, Supplementary Table 1)<sup>21,22</sup>. We used two filtering criteria for downstream analysis:  $|\log_2$   
110  $\text{WT:KO ratio}| > 1.0$  and  $-\log_{10} p \text{ value} > 1.5$ . The abundance of 23 proteins was enriched and 28  
111 proteins was depleted in the MAM fraction of UBXD8 KO cells out of a total of 4499 quantified  
112 (Fig. 2b and Supplementary Fig. 3a). Putative contact site proteins identified in previous studies  
113 were present in our dataset validating our approach (Fig. 2b and Supplementary Fig. 3b,  
114 Supplementary Table 1)<sup>18,23-25</sup>. Furthermore, we identified significant enrichment of known p97-  
115 UBXD8 substrates such as squalene monooxygenase (SQLE), and HMG-CoA reductase  
116 (HMGCR) in UBXD8 KO cells (Fig. 2b and Supplementary Fig. 3g, h). Interestingly, proteins  
117 involved in lipid or cholesterol metabolism and lysosome function were also enriched in the  
118 UBXD8 KO contact proteome ( $\log_2 \text{WT:KO ratio} < -0.65$  and  $-\log_{10} p \text{ value} > 1.5$ ) (Fig. 2b-d and  
119 Supplementary Fig.3c). In summary, our quantitative proteomic studies of the contact proteome  
120 in UBXD8 KO cells suggests that perturbation in the abundance of numerous enzymes linked to  
121 lipid biosynthesis may underlie the dysregulation in contacts.

122 To better understand how cellular lipid metabolism may be impacted by loss of UBXD8  
123 we measured the lipidome of wildtype and UBXD8 KO cells. We identified and quantitatively  
124 measured the relative levels of phospholipids (PLs) using liquid-chromatography high-resolution  
125 tandem mass spectrometry (LC-MS/MS). Our analyses examined the major classes of PLs found  
126 in membranes (and synthesized at contacts) including phosphatidylcholine (PC),  
127 phosphatidylethanolamine (PE), phosphatidylserine (PS), and phosphatidylinositol (PI). We also  
128 examined one-tailed lysophospholipids, which are metabolic byproducts of phospholipids (e.g.,  
129 LPC, LPE, LPS, and LPI). We determined the concentration of 151 PLs in UBXD8 KO cells  
130 relative to their concentration in wildtype cells. In general, most PLs were more abundant in KO  
131 cells (Fig. 2e, f and Supplementary Fig. 4a-c, Supplementary Table 2). Approximately two-thirds  
132 of the two-tailed PC and PE and one-tailed LPC and LPE species were  $\geq 2$ -fold more abundant in  
133 UBXD8 KO cells (Fig. 2e, f Supplementary Fig. 4a-d). The PC species that increased the most in  
134 the UBXD8 KO cells contained one or two double bonds among the fatty acyl tails (i.e., PC (44:1),  
135 PC (44:2), PC (46:1), PC (46:2), PC (48:2), PC (50:2), and PC (52:2)). MS/MS identification of  
136 the individual tails revealed that each of these lipids contained only saturated or monounsaturated  
137 fatty acids ranging in size from C16:0 to C32:1 and that lipids with one or fewer double bonds in  
138 each tail were increased the most by the loss of UBXD8 (Supplementary Fig. 4f and  
139 Supplementary Table 2). Phospholipids are synthesized via a diacylglycerol (DG) intermediate  
140 and DGs are metabolized to generate PLs and TGs. We therefore extended our lipidomics studies  
141 to measure DG and two additional neutral lipids: triacylglycerol (TG) and cholesteryl esters (CE)  
142 that are major components of lipid droplets whose biogenesis at the ER is regulated by UBXD8<sup>26</sup>.  
143 The relative concentration of most DGs were altered by less than 2-fold (Supplementary Fig. 4e).  
144 Of the ten DG species increased by  $\geq 2$ -fold in UBXD8 KO cells, nine contained only saturated or  
145 monounsaturated tails ranging in size from C14:0 to C32:0. Similar to PC and PE, most TG  
146 species were  $\geq 2$ -fold more abundant in KO cells relative to control cells (Supplementary Fig. 4e).  
147 The TG species whose abundance was enhanced the most by the loss of UBXD8 were also

148 enriched in saturated and monounsaturated fatty acyl tails from C14:0 to C32:1. In contrast, most  
149 CE species was unaltered or slightly depleted by the loss of UBXD8 (Supplementary Fig. 4e). In  
150 summary, loss of UBXD8 shifts the lipidome to have a greater abundance of PC, PE, DG, and  
151 TG with saturated and monounsaturated fatty acyl tails demonstrating that UBXD8 is necessary  
152 for regulating lipid concentrations. The synthesis of these phospholipids occurs at contacts and  
153 their altered abundance in UBXD8 KO cells may contribute to defects in contacts<sup>27</sup>.

154 The significantly altered lipidome and related alterations in lipid biosynthetic enzymes  
155 prompted us to ask if these changes stem from the regulation of the sterol regulatory element-  
156 binding proteins 1 and 2 (SREBP1/2) pathway. p97-UBXD8 mediates the activation of ER-  
157 localized SREBPs by mediating ubiquitin-dependent membrane extraction and degradation of the  
158 SREBP negative regulator insulin induced gene 1 (INSIG1), in a sterol or fatty acid-dependent  
159 manner (Supplementary Fig. 5a)<sup>28,29</sup>. A similar pathway for lipid sensing in *S.cerevisiae*, requires  
160 Cdc48p and Ubx2p (orthologs of p97 and UBXD8 respectively),<sup>30</sup> and yeast lacking Ubx2p have  
161 more saturated cellular membranes due to loss of transcriptional activation of  $\Delta^9$  desaturase  
162 *ole1*<sup>30</sup>. We found that loss of p97 or UBXD8 resulted in a significant loss of SREBP1 activation  
163 and accumulation of the inactive ER-tethered form concomitant with stabilization of INSIG1 (Fig.  
164 3a-d). Lipid desaturases are transcriptional targets of SREBP1 and were decreased in abundance  
165 at the transcript level in UBXD8 KO cells (Supplementary Fig.5b). This parallels the decreased  
166 protein abundance of the best characterized desaturases, SCD1 ( $\Delta^9$ ) and FADS1 ( $\Delta^5$ ) in UBXD8  
167 KO or p97 depleted cells (Fig. 3a-d). In contrast, UBXD8 loss did not significantly impact SREBP2  
168 activation or its downstream targets although this may be cell type or context specific (Fig.3a, b  
169 and Supplementary Fig.5c, d). Previous studies have reported that contacts have lipid raft-like  
170 properties and are enriched in cholesterol and sphingolipids<sup>31</sup>, thus the localization of cholesterol-  
171 sensing proteins to these sub-domains may be advantageous for rapid pathway activation. We  
172 find that SREBP1 and SCD1 are enriched at contacts isolated by biochemical fractionation (Fig.

173 3e). Notably, an increase in ER-tethered SREBP1 and a decrease in SCD1 were apparent in the  
174 MAM fractions of UBXD8 KO cells (Fig. 3f). Furthermore, over-expression of mature SREBP1a  
175 and c and to a lesser extent SREBP2, is sufficient to rescue contacts in p97-UBXD8 depleted  
176 cells (Supplementary Fig. 5e, f). Hence, defective SREBP1 activation underlies increased  
177 contacts in p97-UBXD8 depleted cells.

178 The decrease in the abundance of lipid desaturases and our finding that UBXD8 KO cells  
179 have increased phospholipids with saturated or mono-unsaturated tails, prompted us to determine  
180 whether altering membrane lipid saturation perturbed contacts between the ER and mitochondria.  
181 FADS1 isoforms are localized to both ER and mitochondria<sup>32</sup>, therefore we focused on ER-  
182 localized SCD1<sup>33</sup> as it was enriched at contacts (Fig. 3e). We treated wild type HEK-293T cells  
183 with the SCD1 inhibitor MF438<sup>34</sup> and found that contacts between the ER and mitochondria  
184 increased in a manner that could be rescued by supplementing cells with monounsaturated oleic  
185 acid, the product of SCD1, (Supplementary Fig. 5g). We next evaluated whether re-expressing  
186 SCD1 in p97 or UBXD8-depleted cells rescued the increased contact site phenotype.  
187 Overexpression of wildtype SCD1 rescued ER-mitochondria contacts to wild type levels in p97-  
188 UBXD8 depleted cells (Fig. 3g, Supplementary Fig. 5h). In contrast, a catalytically inactive version  
189 of SCD1 was unable to rescue the phenotype (Fig. 3g, Supplementary Fig. 5h). Notably,  
190 overexpression of SCD1 catalytic mutant in wild type cells resulted in an increase in contacts  
191 suggesting that the resulting ordered lipid bilayers may impact contacts (Figure 3g). To further  
192 extend these findings, we asked if simply supplementing p97-UBXD8 depleted cells with  
193 unsaturated oleic acid (18:1), a precursor for the generation of polyunsaturated fatty acids in cells  
194 was sufficient to rescue contacts. Indeed, oleic acid but not saturated palmitic acid (16:0) rescued  
195 the contact defect in p97-UBXD8 depleted cells. Strikingly, palmitic acid alone increased contacts  
196 in wildtype cells (Fig. 3h).

197 Collectively, these results suggested that contacts are exquisitely sensitive to perturbations in  
198 lipid profiles within cellular membranes and that loss of p97-UBXD8 alters membrane lipid



199 composition and saturation. We evaluated whether loss of p97-UBXD8 impacts lipid saturation  
200 globally within the cell. We used lipid-binding pyrene probes that insert into both disordered  
201 (unsaturated) and ordered (saturated) lipid bilayers throughout the cell and undergo monomer to  
202 excimer formation in a manner dependent on local membrane order. We measured the ratio of  
203 monomer to excimer fluorescence as an indicator of membrane order in cells treated with the p97  
204 inhibitor CB-5083 or in UBXD8 KO cells. Loss of UBXD8 or inhibition of p97 resulted in more  
205 ordered cellular membranes (monomer: excimer ratio  $<1$ ) compared to controls in two different  
206 cell lines (Fig.4a, Supplementary Fig.6a). Strikingly this phenotype can be reversed by incubating  
207 cells with oleic but not palmitic acid (Fig.4a, Supplementary Fig.6a). Thus, the local degradation  
208 of INSIG1 and subsequent activation of SREBP1 at contacts impacts lipid composition and  
209 saturation throughout the cell but significantly impact contacts due to their reliance on membranes  
210 for association. These findings prompted us to investigate whether the global increase in  
211 membrane order impacts other ER-organelle contacts. Analysis of TEM data from wildtype and  
212 UBXD8 KO cells demonstrated increased contacts between the ER and plasma membrane (Fig.  
213 4b, c). Whether other ER-organelle contacts are similarly perturbed is under investigation.  
214 Notably, UBXD8 KO cells have an increase in membranous whorls containing concentric  
215 membrane layers, reminiscent of multilamellar bodies that function in lipid storage and secretion  
216 (Supplementary Fig. 6b). Interestingly, these membrane rich structures were also identified in  
217 yeast strains lacking Ubx2p<sup>30</sup> and may arise due to imbalances in lipid levels.

218 Mutations in p97 cause several primarily neurodegenerative protein aggregation disorders.  
219 These include inclusion body myopathy with Paget's disease of the bone and frontotemporal  
220 dementia (IBMPFD, also known as multi-system proteinopathy 1, MSP-1)<sup>35</sup>, amyotrophic lateral  
221 sclerosis (ALS)<sup>36,37</sup>, Charcot Marie Type IIB<sup>38</sup>, among others. We investigated whether p97  
222 disease-associated mutations altered contacts between the ER and mitochondria and perturbed  
223 the SREBP1-SCD1 pathway. We measured contacts in mouse embryonic fibroblasts  
224 heterozygous or homozygous for p97 R155H (a prevalent mutation observed in patients) and

225 observed that cells with p97 R155H homozygous mutation had a significant increase in contacts  
226 that could be rescued with oleic acid but not palmitic acid (Fig. 4d).

227 Next, we evaluated the SREBP-SCD1 pathway in the brains of the two distinct p97 mouse  
228 models<sup>39</sup>. A conditional knockout of p97 (p97 cKO) in the cortex and hippocampus has recently  
229 been shown to develop cortical atrophy, neuronal loss and TDP43 inclusions reminiscent of  
230 frontotemporal dementia<sup>39</sup>. We stained for SREBP1 and SCD1 in the CA1 regions of one-month-  
231 old p97 cKO mice before neurodegeneration phenotypes are observed. Strikingly, p97 cKO mice  
232 had a significant decrease of SREBP1 and SCD1 immunoreactivity in the CA1 region compared  
233 to age-matched controls (Fig. 4e, f). To assess whether these defects were also present in a  
234 pathogenic context, we immunoblotted for SREBP1 and SCD1 in brain lysates from 6- and 13-  
235 month-old p97<sup>R155C/WT</sup> mice<sup>39,40</sup>. SREBP1 processing was significantly diminished at 13 months in  
236 p97<sup>R155C/WT</sup> mice relative to controls (Fig. 4g, h). Similarly, loss of SCD1 protein levels was  
237 apparent at 6 months and continued to decline at 13 months in p97<sup>R155C/WT</sup> mice (Fig. 4g, h).  
238 Collectively, our findings suggest that p97 mutations that cause disease may also have underlying  
239 lipid metabolism deficits that could contribute to disease pathology.

## 240 Discussion

241 Here we have identified an unanticipated role for p97 and its ER-tethered adaptor UBXD8  
242 in regulating ER-mitochondria contacts by perturbing membrane composition and fluidity in  
243 multiple cell types. We propose that altered lipid bilayers that arise upon loss of UBXD8 impact  
244 contacts in multiple ways: (1) preventing their dynamic association and disassociation due to loss  
245 of fluidity, and (2) negatively impacting the lateral movement of tethering proteins within  
246 membranes. UBXD8 is unique among p97 adaptors in its evolutionarily conserved and  
247 multifunctional roles in lipid sensing and metabolism<sup>19,26,30,41-43</sup>. Our proteomic and lipidomic data  
248 from UBXD8 KO cells suggests that widespread changes in lipid metabolism is likely due to the  
249 inability to mobilize SREBP1 from the ER. Similar to the yeast *ubx2* deletion phenotype, we find  
250 decreased abundance of lipid desaturases, particularly SCD1 and complementation of p97-

251 UBXD8 depleted cells with SCD1 rescues contact defects. However, given the significant  
252 changes in lipid profiles in UBXD8 KO cells, it is likely that SCD1 regulation is not the only  
253 mechanism at play. It remains to be determined whether UBXD8 also facilitates the degradation  
254 of contact tethers. We note that UBXD8 is present in pure mitochondrial fractions (Fig. 1a).  
255 Previous studies have observed dual localization of UBXD8 to ER and mitochondria<sup>44,45</sup> and  
256 recently, the yeast ortholog, Ubx2p was reported to localize to the outer mitochondrial membrane  
257 where it associates with the translocon in the outer mitochondrial membrane (TOMM) complex to  
258 clear stalled polypeptides in a p97-dependent manner<sup>46</sup>. Further studies are required to determine  
259 whether mammalian UBXD8 functions in an analogous manner on mitochondria. Aberrant contact  
260 sites are emerging as a common feature in the pathophysiology of a wide spectrum of human  
261 diseases ranging from diabetes to neurodegeneration<sup>47-49</sup>. We find that p97 mutations that cause  
262 proteinopathies also exhibit increased contacts and display significantly decreased levels of  
263 SREBP1 and SCD1. A recent report found that motor neurons from ALS patients with p97  
264 mutations exhibited more contacts between the ER and mitochondria relative to controls<sup>50</sup>. Thus,  
265 altered organelles contacts and downstream lipid synthesis warrants further investigation in p97  
266 associated diseases.

267

## 268 **Figure Legends**

269

### 270 **Fig. 1. Loss of p97 and UBXD8 results in increased ER-mitochondria contacts.**

271 **a**, Immunoblot of indicated proteins from subcellular fractionation of HEK-293T cells, PNS: post-  
272 nuclear supernatant, MAM: Mitochondria associated membrane ( $n > 3$  biologically independent  
273 samples). **b**, Top: Domain organization of UBXD8 and indicated mutations, Middle: Split  
274 luciferase assay to measure contacts in HEK-293T cells transfected with siRNAs to UBXD8 and  
275 indicated C-HA/FLAG siRNA-resistant rescue constructs, RLU: relative luminescence unit,  
276 Bottom: Immunoblot of indicated proteins. UBA: ubiquitin associated, UAS: upstream activating

277 sequence, UBX: ubiquitin X ( $n > 3$  biologically independent samples). **c**, Top: Domain  
278 organization of p97 and indicated mutations, Middle: Split luciferase assay to measure contacts  
279 in HEK-293T cells transfected with siRNAs to p97 and indicated N-Myc siRNA-resistant rescue  
280 constructs, RLU: relative luminescence unit, Bottom: Immunoblot of indicated proteins ( $n \geq 3$   
281 biologically independent samples). **d**, Immunoblot of UBXD8 in CRISPR-Cas9 edited HEK-293T  
282 and HeLa-Fip-IN-T-Rex cells, KO: knockout. **e**, Representative transmission EM micrographs of  
283 wildtype and UBXD8 KO HEK-293T cells illustrating contacts between ER and mitochondria. **f**,  
284 Quantification of contact length between ER and mitochondria in each genotype from (**e**)  
285 (measurements are from  $n = 3$  biological replicates with WT = 50 cells from 65 fields and UBXD8  
286 KO = 53 cells from 71 fields). OMM: Outer mitochondrial membrane. Data are means  $\pm$  SEM (\*,  
287 \*\*, \*\*\* $P < 0.05, 0.01, 0.0001$  respectively, One-way ANOVA with Tukey's multiple comparison  
288 test). Scale bar, 100 nm.

289

290 **Fig. 2. Quantitative proteomics and lipidomics identifies a role for UBXD8 in regulating**  
291 **lipid metabolism at contacts.**

292 **a**, Schematic of tandem mass tag (TMT) proteomic workflow from wildtype and UBXD8 KO HEK-  
293 293T cells. PNS: post-nuclear supernatant, MAM: mitochondria associated membrane. **b**,  
294 Volcano plot of the ( $-\log_{10}$ -transformed  $P$  value versus the  $\log_2$ -transformed ratio of wildtype/  
295 UBXD8 KO) proteins identified from MAM fractions of HEK-293T cells.  $n = 3$  biologically  
296 independent samples for each genotype.  $P$  values were determined by empirical Bayesian  
297 statistical methods (adjusted for multiple comparisons) using the *LIMMA* R package; for  
298 parameters, individual  $P$  values and  $q$  values, see Supplementary Table 1. **c**, Network of  
299 differentially enriched terms shown as clustered functional ontology categories. Each node  
300 represents a functional ontology term enriched in the TMT data (**a**, **b**) as scored by Metascape<sup>51</sup>.  
301 Networks were generated using Cytoscape v3.8.2. Size of node represents number of genes  
302 identified in each term by gene ontology (GO). Grey and Blue donuts represent percent of genes

303 identified in each GO term in wildtype or UBXD8 KO respectively. Node outline thickness  
304 represents  $-\log_{10}$ -transformed  $P$  value of each term. The inner circle color of each node indicates  
305 the corresponding functional GO cluster. **d**, Bubble plot representing significantly enriched GO  
306 clusters identified from TMT proteomics of MAM fractions in wildtype (blue) or UBXD8 KO (green)  
307 cells (**a-c**). Size of the circle indicates the number of genes identified in each cluster. **e-f**, Relative  
308 levels of Phosphatidylcholine (PC) (**e**) and Phosphatidylethanolamine (PE) (**f**) in HEK-293T WT  
309 and UBXD8 KO cells. PLs were measured by LC-MS/MS following normalization by total protein  
310 amount. Each dot in the plot represents the level of a PL in UBXD8 KO cells relative to its level in  
311 wildtype cells. The dashed line represents a relative level of 1 (e.g., the level in UBXD8 KO cells  
312 is equal to the level in wildtype cells). ( $n = 3$  biologically independent experiments were performed,  
313 each with duplicate samples). Statistical analysis was performed on the log transformed relative  
314 fold change values (UBXD8 KO relative to WT) using independent  $t$  tests and Benjamini-  
315 Hochberg correction in R stats package (p-values are listed in Supplemental Table 1).

316

317 **Fig. 3. Loss of SREBP1 activation and SCD1 expression upon p97-UBXD8 depletion is**  
318 **responsible to contact defects.**

319 **a-d** Immunoblot and the corresponding band intensity quantifications of indicated proteins in the  
320 SREBP pathway in wildtype and UBXD8 KO HEK-293T cells (**a & b**), or p97-siRNA depleted cells  
321 (**c & d**). All samples were transfected with INSIG1-HA/FLAG due to lack of reliable antibodies to  
322 the endogenous protein. ( $n \geq 3$  biologically independent samples). **e**, Immunoblot of indicated  
323 SREBP pathway proteins from subcellular fractionation of HEK-293T cells, PNS: post-nuclear  
324 supernatant, MAM: mitochondria associated membrane. ( $n = 3$  biologically independent  
325 samples). **f**, Immunoblot of indicated SREBP pathway proteins from subcellular fractionation of  
326 wildtype and UBXD8 KO HEK-293T cells, MAMs: mitochondria associated membrane. ( $n = 3$   
327 biologically independent samples). Corresponding fold changes (FC: UBXD8 KO vs WT) of  
328 SREBP1 and SCD1 normalized to FAFL4 is shown. **g**, Split luciferase assay in HEK293T cells

329 transfected with indicated siRNAs and wildtype or catalytically dead SCD1. GFP-HA/FLAG was  
330 transfected as a negative control. RLU: relative luminescence unit. ( $n \geq 3$  independent biological  
331 replicates). **h**, Split luciferase assay in HEK293T cells transfected with indicated siRNAs and  
332 treated with either monounsaturated oleic acid or saturated palmitic acid. RLU: relative  
333 luminescence unit. ( $n \geq 3$  independent biological replicates). Data are means  $\pm$  SEM (\*, \*\*,  
334 \*\*\* $P < 0.05, 0.01, 0.0001$  respectively. Paired  $t$  test (**b & d**), or One-way ANOVA with Tukey's  
335 multiple comparison test (**g & h**).

336

337 **Fig. 4. Supplementation of p97-UBXD8 depleted cells with oleic acid rescues contact**  
338 **defects.**

339 **a**, Global membrane fluidity was measured using a pyrene-based lipid probe in wildtype and  
340 UBXD8 KO HEK-293T cells. Wildtype cells were also treated with 5  $\mu$ M of the p97 inhibitor CB-  
341 5083 for 4 hours. Cells were supplemented with indicated concentrations of oleic acid and palmitic  
342 acid for 4 hours. The fold change ( $\text{Treated}_{\text{excimer:monomer}}$  vs  $\text{Control}_{\text{excimer:monomer}}$ ) of the ratio of  
343 excimer (Em. Max. 460nm) to monomer (Em max. 400nm) fluorescence is indicated. Fold  
344 changes  $< 1$  indicate more ordered lipid bilayers relative to wildtype untreated control. ( $n \geq 3$   
345 biologically independent samples). **b**, Representative transmission EM micrographs of wildtype  
346 and UBXD8 KO HEK-293T cells illustrating contacts between ER and plasma membrane. **c**,  
347 Quantification of contact length between ER and plasma membrane in each genotype from (**b**)  
348 (measurements are from  $n = 3$  biological replicates with WT = 50 cells from 65 fields and UBXD8  
349 KO = 53 cells from 71 fields). **d**, Split luciferase assay to measure contacts in mouse embryonic  
350 fibroblasts with heterozygous or homozygous p97 R155H mutation. Cells were supplemented  
351 with indicated concentrations of oleic acid and palmitic acid for 4 hours. ( $n \geq 3$  biologically  
352 independent samples). **e**, Representative SREBP1 and SCD1 staining from CA1 regions of 1  
353 month-old control (CAMK2 $\alpha$ ) and p97 cKO mice (scale bar is 25  $\mu$ m). **f**, Quantification of

354 fluorescence intensity of images in **(e)**. Individual points represent mean ROI intensity from each  
355 mouse, 3 or 4 animals per group. **g**, Representative immunoblot for SREBP1 and SCD1 from  
356 cortical brain lysates of 12-month-old control (C57), or 6- and 12-month-old p97<sup>R155C/WT</sup> mice (n=4  
357 for each group). Pan 14-3-3 was used as housekeeping control. **h**, Quantification of **(g)**. The ratio  
358 of mature SREBP to total SREBP is shown. SCD1 intensities are normalized to 14-3-3 levels in  
359 each lane. Individual points represent each mouse, 4 animals per group. Data are means  $\pm$  SEM  
360 (\*, \*\*, \*\*\* $P < 0.05, 0.01, 0.0001$  respectively. Significance was analyzed by One-way ANOVA with  
361 Newman-Keuls multiple comparison test **(a)** or Tukey's multiple comparison test **(c, d)** or  
362 Dunnett's multiple comparison **(h)** or Student's *t*-test **(f)**.

363

## 364 **Supplementary Figure Legends**

365

366 **Supplementary Fig. 1. Loss of p97 and UBXD8 results in increased ER-mitochondria**  
367 **contacts.**

368 **a**, Split luciferase assay to measure contacts in HEK-293T cells transfected with REEP1 ( $n > 3$   
369 biologically independent samples). **b**, Left: Split luciferase assay to measure contacts in HEK-  
370 293T cells transfected with indicated siRNAs. ( $n \geq 3$  biologically independent samples). Right:  
371 Immunoblot of HEK 293T cells transfected with indicated siRNAs. **c**, Affinity purification of  
372 indicated UBXD8-HA/FLAG constructs transiently expressed in HEK-293T cells. Immunoblots of  
373 whole cell lysates and affinity purifications probed with anti-HA, anti-p97, anti-PCNA, and ubiquitin  
374 antibodies ( $n = 3$  biologically independent samples). **d**, Top: Representative confocal image of  
375 HeLa-Flp-IN-TRex cells stably expressing Sec61 $\beta$ -eGFP (green, ER) and stained for endogenous  
376 TOMM20, (red, mitochondria). Bottom: ImageJ image analysis pipeline for the quantification of  
377 contacts between ER and mitochondria<sup>52</sup>. **e**, Quantification of ER- mitochondria contacts in cells  
378 transfected with indicated siRNAs (left and middle panel) or in UBXD8 KO HeLa-Flp-IN-TRex  
379 cells (right panel) using assay in **(d)**. Bottom panels show immunoblots for knockdown efficiency.

380 ( $n = 3$  biologically independent samples) N: numbers of cells analyzed in each condition.  
381 (Quartiles represent the upper 75th percentile and the lower 25th percentile. The line inside the  
382 box represents the median. Whiskers indicate distribution of data from minimum to maximum in  
383 a condition.). **f**, Quantification of number of mitochondria per field from transmission electron  
384 microscopy of wildtype and UBXD8 KO cells. (Measurements are from  $n = 3$  biological replicates  
385 with WT = 50 cells in 65 fields and UBXD8 KO = 53 cells in 71 fields). Data are means  $\pm$  SEM (\*,  
386 \*\*, \*\*\* $P < 0.05, 0.01, 0.0001$  respectively. One-way ANOVA with Tukey's multiple comparison test  
387 (**b & e** (left and middle panel)), Paired  $t$ -test (**a**) or Unpaired  $t$  test with Welch's correction (**e** (right  
388 panel) & **f**).

389

### 390 **Supplementary Fig. 2. ER stress does not alter ER-mitochondria contacts.**

391 **a**, Split luciferase assay to measure contacts in HEK-293T cells treated with 2.5  $\mu$ M Tunicamycin  
392 (Tu), 1.5  $\mu$ M Thapsigargin (Tg), for 2 hours. ( $n = 3$  biologically independent samples). Immunoblot  
393 of HEK-293T cells treated with Tu and Tg and probed for the indicated proteins. **b**, Immunoblot  
394 of HEK-293T wildtype and UBXD8 KO cells treated with 1.5  $\mu$ M Thapsigargin (Tg) for 2 hours,  
395 UT: Untreated. ( $n = 3$  biologically independent samples). Data are means  $\pm$  SEM (ns: not  
396 significant). One-way ANOVA with Tukey's multiple comparison test (**a**).

397

### 398 **Supplementary Fig. 3. Quantitative proteomics of wildtype and UBXD8 KO contact** 399 **proteome.**

400 **a**, Table depicting number of proteins and peptides quantified in post-nuclear supernatant and  
401 mitochondria associated membrane fractions identified by proteomics in wildtype and UBXD8 KO  
402 cells. Number of proteins up- or downregulated at  $\log_2$ - fold change (FC) (wildtype/ UBXD8 KO)  
403  $\pm 0.65$  and  $\pm 1$  is indicated. **b**, Venn diagram depicting overlap of our dataset with other putative  
404 mitochondria associated membrane proteins identified by proteomics<sup>18,23-25</sup> **c**, Protein-protein  
405 interaction network of differentially expressed proteins from MAM fractions of HEK-293T cells



406 involved in ERAD, cholesterol biosynthesis and lysosome function shown as clustered functional  
407 categories. Protein associations were determined using STRING database with score  $\geq 0.4$ . Each  
408 node represents a protein belonging to enriched GO clusters as scored by Metascape. Size of  
409 node represents  $-\log_{10}$ -transformed  $P$  value and color of node represents  $\log_2$ - fold change (FC)  
410 (WT / UBXD8 KO). **d**, Volcano plot of the  $-\log_{10}$ -transformed  $P$  value *versus* the  $\log_2$ -transformed  
411 ratio of wildtype/ UBXD8 KO proteins identified in the post-nuclear supernatant of HEK-293T cells.  
412  $n = 3$  (each genotype) biologically independent samples.  $P$  values were computed by empirical  
413 Bayesian statistical methods (adjusted for multiple comparisons) available in *Limma* R package;  
414 for parameters, individual  $P$  values and  $q$  values, see Supplementary Table 1. **e**, Network of  
415 differentially enriched functional ontology terms shown as clustered functional ontology  
416 categories. Each node represents a functional ontology term enriched in the TMT data (**d**) as  
417 scored by Metascape and networks generated using Cytoscape v3.8.2. Size of node represents  
418 number of genes identified in each term by gene ontology (GO). Grey and Blue donuts represent  
419 percent of genes identified in each GO term in wildtype or UBXD8 KO respectively. Node outline  
420 thickness represents  $-\log_{10}$ -transformed  $P$  value of each term. The inner circle color of each node  
421 indicates the corresponding functional GO cluster. **f**, Bubble plot representing significantly  
422 enriched GO clusters identified from TMT proteomics of post-nuclear fractions in wildtype (blue)  
423 or UBXD8 KO (green) cells (**d-e**). Size of the circle indicates the number of genes identified in  
424 each cluster. **g,h**, Squalene epoxidase (SQLE) half-life measurements in wildtype and UBXD8  
425 KO HEK 293T cells. FLAG-SQLE was transiently expressed, and cells were treated with 100  
426  $\mu\text{g}/\text{mL}$  cycloheximide for the indicated times. Samples were resolved on SDS-PAGE for  
427 immunoblots (**g**) and levels of SQLE were quantified and normalized to loading control PCNA (**h**).  
428 ( $n = 3$  biologically independent samples). Data are means  $\pm$  SEM (\*, \*\*, \*\*\*  $P < 0.05, 0.01, 0.0001$   
429 respectively. One-way ANOVA with Tukey's multiple comparison test (**h**).  
430

431 **Supplementary Fig. 4. Loss of UBXD8 alters cellular lipidome with increased abundance**  
432 **of saturated fatty acid tail containing phospholipids**

433 **a**, Relative levels of phospholipids (PLs), namely PG, phosphatidylglycerol; PI,  
434 phosphatidylinositol; and PS, phosphatidylserine in HEK-293T WT and UBXD8 KO cells. PLs  
435 were measured by LC-MS/MS following normalization by total protein amount. Each dot in the  
436 plot represents the level of a PL in UBXD8 KO cells relative to its level in wildtype cells. The  
437 dashed line represents a relative level of 1 (e.g., the level in UBXD8 KO cells is equal to the level  
438 in wildtype cells). ( $n = 3$  biologically independent experiments were performed, each with duplicate  
439 samples). **b**, Relative levels of DG, Diacylglycerol; TG, Triacylglycerol in HEK-293T WT and  
440 UBXD8 KO cells. The DG and TG is quantified and visualized similarly as in **a**. ( $n = 3$  biologically  
441 independent experiments were performed, each with duplicate samples). **c**, Relative levels of CE,  
442 Cholesteryl esters in HEK-293T WT and UBXD8 KO cells. The CE is quantified and visualized  
443 similarly as in **a**. ( $n = 3$  biologically independent samples). **d-e**, Changes in the relative levels of  
444 PLs (**d**) including lysophospholipids (LPC, Lysophosphatidyl choline; LPE, Lysophosphatidyl  
445 ethanolamine; LPS, Lysophosphatidyl Serine; and LPI, Lysophosphatidyl Inositol) and (**e**) Neutral  
446 lipids (DGs, TGs, and CEs) in HEK-293T WT and UBXD8 KO cells were quantified. The averaged  
447 relative fold changes were  $\log_2$  transformed and visualized as a heatmap. ( $n = 3$  biologically  
448 independent experiments were performed, each with duplicate samples). **f**, Dot plots representing  
449 fold change of PC and PE lipids in UBDX8 KO cells relative to WT cells and fatty acid tails  
450 determined by MS/MS. The two tails of the lipid are shown and organized so that tail 1 (y-axis) is  
451 the shorter tail and tail 2 (x-axis) is the longer tail. The labels tail 1 and tail 2 do not represent their  
452 stereospecific number (sn). Grey boxes indicate the increase in saturated and mono-unsaturated  
453 tails in UBXD8 KO cells. Statistical analysis was performed on the  $\log_2$  transformed relative fold  
454 change values (UBXD8 KO relative to WT) using independent t tests and Benjamini-Hochberg  
455 correction in R stats package (p-values are listed in Supplemental Table S3).

456

457 **Supplementary Fig. 5. Diminished SREBP pathway activation in UBXD8 KO cells**

458 **a**, Schematic of SREBP pathway activation. In cholesterol-replete conditions, SCAP-INSIGs-  
459 SREBPs are in an inactive tripartite complex in the ER membrane. Cholesterol depletion triggers  
460 a conformational change in SCAP releasing it from INSIGs and enabling the transport of SCAP-  
461 SREBPs to the Golgi. Here SREBPs are cleaved sequentially by site 1 and site 2 proteases to  
462 release the active transcription factor. INSIGs are ubiquitinated and extracted for degradation  
463 from the membrane by p97-UBXD8. **b-c**, Real-time quantitative PCR of SREBP1 target genes  
464 including lipid desaturases (**b**), and SREBP2 target genes (**c**). **d**, Band intensity quantifications of  
465 mature SREBP2 in wildtype and UBXD8 KO HEK-293T cells corresponding to **Fig 3a** ( $n \geq 3$   
466 biologically independent samples) **e**, Split luciferase assay to measure contacts in HEK-293T  
467 cells transfected with siRNAs to UBXD8 or p97 and indicated 2X-FLAG-tagged mature SREBP1a,  
468 1c, and 2 constructs. RLU: relative luminescence unit. ( $n = 4$  biologically independent samples).  
469 **f**, Immunoblot of indicated proteins in HEK-293T cells transfected with siRNAs to UBXD8 or p97  
470 and indicated 2X-FLAG-tagged mature SREBP1a, 1c, and 2 constructs. Immunoblots were  
471 probed with antibodies to SREBP1 and 2 to visualize immature and transfected mature forms. **g**,  
472 Split luciferase assay to measure contacts in HEK 293T cells treated with SCD1 inhibitor MF438  
473 at 1  $\mu$ M for 4 hours. Cells were also treated with oleic acid for 4 hours as indicated. ( $n \geq 3$   
474 biologically independent samples). **h**, Immunoblot of indicated proteins in HEK293T cells  
475 transfected with indicated siRNAs and wildtype or catalytically dead mutant of SCD1. GFP-  
476 HA/FLAG was transfected as a negative control. Related for Fig. **3e**. ( $n = 3$  independent biological  
477 replicates). Data are means  $\pm$  SEM (\*, \*\*, \*\*\*  $P < 0.05, 0.01, 0.0001$  respectively. One-way ANOVA  
478 with Dunnett's multiple comparison test (**b, c**), Paired  $t$  test with Welch's correction (**d**) or One-  
479 way ANOVA with Tukey's multiple comparison test (**e & g**).

480

481 **Supplementary Fig. 6. Loss of UBXD8 perturbs membrane saturation.**

482 **a**, Global membrane fluidity in cells was measured using pyrene-based lipid probes in wildtype  
483 and UBXD8 KO HeLa-Flp-IN-TREx cells. Wildtype cells were also treated with 5  $\mu$ M of the p97  
484 inhibitor CB-5083 for 4 hours. Cells were supplemented with indicated concentrations of oleic acid  
485 and palmitic acid for 4 hours. The fold change ( $\text{Treated}_{\text{excimer:monomer}}$  vs  $\text{Control}_{\text{excimer:monomer}}$ ) of ratio  
486 of excimer (Em. Max. 460nm) to monomer (Em max. 400nm) fluorescence is indicated. Fold  
487 changes  $< 1$  indicate more ordered lipid bilayers relative to WT untreated control. ( $n = 3$   
488 biologically independent samples). **b**, Representative transmission EM micrographs of  
489 multilamellar bodies (red arrows) containing membrane whorls in UBXD8 KO HEK-293T cells.  
490 Lower panel shows quantification of multilamellar bodies from images in **(c)**. (Measurements are  
491 from  $n = 3$  biological replicates with WT = 50 cells in 65 fields and UBXD8 KO = 120 cells in 122  
492 fields). Data are means  $\pm$  SEM (\*, \*\*, \*\*\* $P < 0.05, 0.01, 0.0001$  respectively, One-way ANOVA with  
493 Tukey's multiple comparison test **(a)**). Scale bar, 100 nm.

494

## 495 **Materials and Methods**

496

### 497 **Cell culture, transfections, immunoprecipitations, and treatments.**

498 HEK293T, HeLa Kyoto Mouse embryonic fibroblasts (MEFs), and HeLa-Flp-IN-TREX  
499 (HFTs, gift from Brian Raught, University of Toronto) cells were cultured in Dulbecco's modified  
500 Eagle's medium, supplemented with 10% fetal bovine serum (FBS) and 100 units/mL penicillin  
501 and streptomycin. Cells were maintained in a humidified, 5 % CO<sub>2</sub> atmosphere at 37°C. HeLa  
502 Kyoto wildtype cell line was a generous gift from Ron Kopito (Stanford University).

503 For siRNA transfections, HEK293T cells were trypsinized and reverse transfected with  
504 siRNAs. HeLa Kyoto, MEF, and HFT cells were trypsinized and seeded into a 12-well or 6-well  
505 dish 24 hours prior to siRNA transfections. In both reverse and forward transfections, the cells  
506 were transfected with 20 nM siRNAs using RNAiMax (Invitrogen) according to the manufacturer's  
507 protocol. Cells were harvested 48-72 hours post transfection. For DNA transfections, HEK293T

508 cells in 6 well plates were transfected with 0.75  $\mu$ g pcDNA3-Mit-NR1uc91 and pcDNA3-CR1uc92-  
509 ER, 0.75  $\mu$ g of UBXD8-C-HA/FLAG constructs, 1  $\mu$ g of N-Myc-p97 constructs, 1  $\mu$ g of p97-C-Myc,  
510 1  $\mu$ g of SCD1-C-HA/FLAG constructs, 0.2-0.5  $\mu$ g of GFP-C-HA/FLAG, 0.75  $\mu$ g of pCIG construct,  
511 0.75  $\mu$ g of REEP1, or 0.75  $\mu$ g each of 2X-FLAG-SREBP1a, 2X-FLAG-SREBP1c, 2X-FLAG-  
512 SREBP2 using Polyethyleneimine (PEI) at 1:4 DNA:PEI ratio and typically harvested 36-48 hours  
513 post transfection. HeLa Kyoto, MEF, and HFT cells were transfected with cDNA using  
514 Lipofectamine 2000 (Invitrogen) and the cells were harvested 36-48 hours post transfection. Cells  
515 were lysed in mammalian cell lysis buffer (50 mM Tris-Cl, pH 6.8, 150 mM NaCl, 0.5% Nonidet  
516 P-40, HALT Protease inhibitors (Pierce) and 1 mM DTT). Cells were incubated at 4°C for 10 min  
517 and then centrifuged at 14,000 rpm for 15 min at 4°C. The supernatant was collected, and protein  
518 concentration was estimated using the DC protein assay kit (Biorad). Protein G agarose (Pierce,  
519 Thermo Fisher scientific) and the indicated antibodies were used for immunoprecipitation at 4°C  
520 for 3-5 hours. Beads were washed 3-5 times in 1 ml mammalian cell lysis buffer and resuspended  
521 in 2X SDS sample buffer. Cells were treated with 1  $\mu$ M of Bortezomib, 5  $\mu$ M CB-5083, 5  $\mu$ g/ml of  
522 puromycin, 1  $\mu$ M SCD1 inhibitor (MF438), 1 mM Oleic acid, or 0.25 mM Palmitic acid for the  
523 indicated times (see figures for details). A full list of constructs used in this study can be found in  
524 Supplementary Table 3.

525

### 526 **Generation of CRISPR cell lines.**

527 The CRISPR-Cas9 gene editing system was used to generate UBXD8 knockout cell lines in  
528 HEK293T, and HFT cells. The guide sequence 5' GTTAACCTGCAGGGGTCGTGA 3' was  
529 cloned into the pX459 vector carrying the hSpCas9 and transiently transfected into HEK293T and  
530 HeLa-Flp-IN-TREx cells using Lipofectamine 3000 (Invitrogen) per the manufacturer's protocol.  
531 36 hours post-transfection the cells were selected with 1  $\mu$ g/ml puromycin for a further 24-36-hrs.

532 The surviving cells were then serially diluted into 96 well plates for clonal selection and expression  
533 levels were monitored by immunoblotting.

534

#### 535 **Antibodies, siRNAs and Reagents.**

536 The p97 (10736-1-AP), UBXD8 (16251-1-AP), FAFL4 (22401-1-AP), UBXD2 (21052-1-AP),  
537 HRD1 (13473-1-AP), Sec61 $\beta$  (51020-2-AP), Calnexin (10427-2-AP), UBXN1 (16135-1-AP),  
538 SREBP1 (14088-1-AP), SREBP2 (28212-1-AP), FADS1 (10627-1-AP), anti-GFP (66002-1-AP)  
539 and SCD1 (23393-1-AP) antibodies were from Proteintech Inc. The TIMM23 (H-8; sc514463),  
540 TOMM20 (F-10; sc17764), TOMM70 (A-8; sc390545), pan-ubiquitin (P4D1; sc8017), c-Myc  
541 (9E10; sc40),  $\beta$ -Actin (AC-15; sc69879), GAPDH (O411; sc47724), PCNA (PC10; sc56), UBE2J1  
542 (B-6; sc377002), and UBE2S (C-1; sc390917) antibodies were obtained from Santa Cruz  
543 Biotechnologies. LC3B (D11; 3868S), and BiP (C50B12; 3177T) were from Cell Signaling  
544 Technologies. Derlin1 (A302-849A-T), p97 (A300-589A), and TEB4/MARCHIV (A304-171A-T)  
545 were from Bethyl laboratories. The following antibodies UBXD7 (PA5-61972; Invitrogen), anti-HA  
546 (16B12; MMS-101P, Covance), anti-FLAG (M2; F3165 Sigma Aldrich), INSIG1 (ab70784;  
547 Abcam) were used for immunoblotting. HRP conjugated anti-rabbit (W401B) and anti-mouse  
548 (W402B) secondary antibodies were from Promega. CB-5083 was a gift from Cleave Biosciences  
549 and Bortezomib was from Selleckchem. Palmitic acid (100905) is from MP Biomedicals and Oleic  
550 acid (270290050) is from Acros Organics. MF438 (569406) is from Millipore Sigma. All siRNAs  
551 were purchased from Ambion (Thermo Fisher Scientific). UBXD8-0 (s23260), UBXD8-9 (s23259),  
552 UBXD7-7 (s24997). UBXD2-1 (D-014184-03), UBXD2-2 (D-014184-04), HRD1-3 (D-007090-03),  
553 and HRD1-4 (D-007090-04) were purchased from GE Dharmacon. siControl (SIC001) was from  
554 Millipore Sigma. p97 siRNAs (2-HSS111263 and 3-HSS111264) were from Invitrogen (Thermo  
555 Fisher Scientific). p97 rescue constructs were previously published<sup>53</sup> and were resistant to siRNA  
556 # 2. UBXD8-C-HA/FLAG construct was previously published<sup>53</sup>. The UBXD8 rescue constructs,

557 including UBA\* (<sup>17</sup>LLQF<sup>20</sup> mutated to <sup>17</sup>AAAA<sup>20</sup>), ΔUAS (deleted amino acids between 122-277),  
558 and UBX\* (<sup>407</sup>FPR<sup>409</sup> mutated to <sup>407</sup>AAA<sup>409</sup>), were cloned using overlap PCR followed by Gibson  
559 assembly (NEB) cloning into pHAGE-C-HA/FLAG and were resistant to siRNA # 0. The SCD1-C-  
560 HA/FLAG WT and catalytic dead mutant (His<sup>160</sup> His<sup>161</sup> and His<sup>301</sup> His<sup>302</sup> mutated to Ala<sup>160</sup> Ala<sup>161</sup>  
561 and Ala<sup>301</sup> Ala<sup>302</sup>) constructs were cloned using overlap PCR followed by Gateway cloning  
562 (Thermo Fisher Scientific) into pHAGE-C-HA/FLAG.

563

#### 564 **Mitochondria-associated membranes (MAM) fractionation.**

565 MAMs were isolated as previously described <sup>54,55</sup>. Briefly, HEK293T or HeLa-Flp-IN-T-Rex cells  
566 were seeded into four 150 mm TC dishes. Cells were lysed in Homogenization buffer (225 mM  
567 mannitol, 75 mM sucrose, and 30 mM Tris-Cl, pH 7.4) using a Dounce homogenizer. The lysate  
568 was centrifuged three times at 600xg for 5 minutes to remove unlysed cells and nuclei resulting  
569 in post-nuclear supernatants (PNS). The cleared lysate was centrifuged at 7000xg to separate  
570 crude mitochondrial pellet and supernatant containing microsomes. The supernatant was cleared  
571 by centrifugation at 20,000xg for 30 minutes followed by microsome isolation using high-speed  
572 centrifugation at 100,000xg for 1 hour. The crude mitochondrial pellet was washed twice in  
573 homogenization buffer containing 0.1 mM EGTA at 7000xg and 10,000xg for 10 minutes. MAMs  
574 were isolated from crude mitochondria using 30% Percoll gradient centrifugation at 95,000xg for  
575 1 hr in a swinging-bucket rotor. The banded MAM fraction was washed once with phosphate-  
576 buffered saline (PBS) before lysing in lysis buffer (50 mM Tris-Cl, pH 7.2, 150 mM NaCl, 2%  
577 SDS). The pure mitochondrial fractions were resuspended and washed in mitochondrial  
578 resuspension buffer (250 mM mannitol, 0.5 mM EGTA, 5 mM HEPES pH7.4). Mitochondrial  
579 membranes were solubilized using 0.5% (v/v) Digitonin. Protein concentrations for both soluble  
580 and pellet fractions were determined by DC protein assay kit (Biorad).

581

#### 582 **Split luciferase assay to measure ER-Mitochondria contacts.**

583 Cells seeded a day prior in a 12-well plates were co-transfected with 0.75  $\mu$ g pcDNA3-Mit-  
584 NRluc91 and pcDNA3-CRluc92-ER (kind gift from Jeffrey A. Golden, Brigham and Women's  
585 Hospital, Boston) using PEI at a 1:4 (DNA:PEI) ratio, or Lipofectamine 2000 (Invitrogen) as per  
586 manufacturer's protocol. Media was changed after 6 hour and 18 hour later the cells are split into  
587 a clear bottom white 96-well plate with 50-100K cells per well. After 24 hours, 30  $\mu$ M of live-cell  
588 substrate Enduren (Promega) was added to cells and incubated for 2-3 hours in a 37°C incubator.  
589 The luminescence was measured using a SpectraMax iD3 multi-well plate reader. The  
590 luminescence measurements were normalized to the cell viability in each condition. Cell viability  
591 was measured using Cell Titer-Glo (Promega) according to the manufacturers' instructions.  
592 Relative luminescence units (RLU) for each cell line were normalized to the DMSO treated  
593 samples to derive fold changes in RLU. Mean, standard error of means (SEM) and statistical  
594 significance were calculated by one way ANOVA with indicated post-hoc analysis using  
595 GraphPad Prism 5.01 ([www.graphpad.com](http://www.graphpad.com)).

596

### 597 **Immunofluorescence and Microscopy.**

598 HFT cells stably expressing Sec61 $\beta$ -eGFP were grown on #1.5 cover slips in a 12 well plate and  
599 transfected with indicated siRNAs using RNAiMax. 48 hours post-transfection, cells were washed  
600 briefly in PBS and fixed with 4% paraformaldehyde at room temperature for 15 min. Cells were  
601 washed in PBS and permeabilized in ice-cold 100% methanol at -20°C for 10 min. Cells were  
602 washed three times in PBS and blocked in 2% BSA in PBS with 0.3% Triton X-100 for 1 hour.  
603 The coverslips were incubated overnight with the indicated antibodies in a humidified chamber.  
604 The cells were washed and incubated for a further hour with appropriate Alexa-Fluor conjugated  
605 secondary antibodies (Molecular Probes) for 1 hour in the dark. Cells were washed with PBS,  
606 nuclei were stained with Hoechst and mounted on slides. All images were collected using a Nikon  
607 A1R scan head with spectral detector and resonant scanners on a Ti-E motorized inverted



608 microscope equipped with 60× Plan Apo NA 1.4 objective lens. The indicated fluorophores were  
609 excited with either a 405nm, 488nm or 594nm laser line. Images were analyzed using FIJI  
610 (<https://imagej.net/Fiji>). Using a previously described method<sup>52</sup>, co-localized pixel analysis to  
611 quantify the ER-mitochondrial contact sites was performed using an ImageJ macro containing  
612 tubeness, colocalization highlighter, and isophotcounter plugins (Supplementary fig 2a).

613

#### 614 **Lipid depletion and fatty acid supplementation.**

615 Cells were depleted of or supplemented with fatty acids as previously described<sup>56-58</sup>. Briefly, cells  
616 were treated with DMEM containing 0.5% lipid-depleted fetal calf serum (LDFCS; S5394, Sigma-  
617 Aldrich) for 24 hours. 500 mM Oleic acid in DMSO was used as a stock solution to prepare a  
618 working solution of 1 mM in DMEM containing 0.5% LDFCS. Cells were treated for 4 hr. 500 mM  
619 palmitic acid stock solution was prepared in 100% ethanol by heating to 70°C for 20 min. This  
620 stock solution, was used to prepare 0.25 mM palmitic acid solution in DMEM containing 0.5%  
621 LDFCS which was heated in a water-bath at 50°C for 2 hr. The 0.25 mM palmitic acid solution is  
622 cooled down to 37°C before adding to cells. Cell were incubated in palmitic acid solution for 4 hr.  
623 All working solutions were prepared immediately prior to treatment.

624

#### 625 **Real time polymerase chain reaction (PCR)**

626 Equal number of HEK293T WT or UBXD8 KO cells were seeded into a 6-well plate. The next day,  
627 total RNA was isolated as per manufacturer's instructions using the PureLink RNA Mini kit  
628 (Thermo fisher). The purified RNA was quantified and an equal amount of RNA was used for  
629 cDNA preparation using iScript cDNA synthesis kit (Biorad). GAPDH was used as a housekeeping  
630 gene was used. Primer sequences used in this study can be found in Supplementary Table 3.  
631 Real time PCR was performed using the Powerup SyBr green master mix (Thermo Fisher). Data  
632 analyses were carried out using the  $2^{-\Delta\Delta Ct}$  method.

633

634 **Membrane fluidity measurements**

635 Cells were seeded in clear bottom black 96-well plate and treated with 5  $\mu$ M CB-5083, lipid  
636 depletion or lipid supplementation as described above. Membrane fluidity was measured using a  
637 membrane fluidity kit (Abcam, ab189819) as per manufacturer's instructions. The assay uses a  
638 lipophilic, membrane embedding pyrenedecanoic acid probe which undergoes a spectral shift in  
639 emission from monomer (Em 400nm) to excimer (Em 460nm) based on local membrane fluidity  
640 upon excitation at 360nm. The excimer to monomer (Em 460nm / Em 400nm) ratio was calculated  
641 for each sample. Then fold changes of ratios (Treated<sub>excimer:monomer</sub> vs Control<sub>excimer:monomer</sub>) were  
642 deduced to provide a relative estimate of membrane fluidity compared to the wildtype untreated  
643 control. A fold change less than 1 indicates ordered membranes relative to control.

644

645 **Transmission Electron microscopy.**

646 Cells were fixed in 2.5% glutaraldehyde, 3% paraformaldehyde with 5% sucrose in 0.1 M sodium  
647 cacodylate buffer (pH 7.4), pelleted, and post fixed in 1% OsO<sub>4</sub> in veronal-acetate buffer. The  
648 cells were stained *en bloc* overnight with 0.5% uranyl acetate in veronal-acetate buffer (pH 6.0),  
649 then dehydrated and embedded in Embed-812 resin. Sections were cut on a Leica EM UC7 ultra  
650 microtome with a Diatome diamond knife at a thickness setting of 50 nm, stained with 2% uranyl  
651 acetate, and lead citrate. The sections were examined using a FEI Tecnai spirit at 80KV and  
652 photographed with an AMT CCD camera. The images were analyzed manually for the ER-  
653 Mitochondrial and ER-PM contacts using FIJI (<https://t/imagej.net/Fiji>). Briefly, the scale of image  
654 was set using Set Scale tool on ImageJ. Followed by measuring the length of ER, PM, or  
655 perimeter of mitochondria using freehand line tool. The percent of contact length was determined  
656 by taking the ratio of the length of ER, or PM (within contact distances of 25-100nm) to the  
657 perimeter of mitochondria. The data were analyzed using GraphPad Prism 5.01 for Windows,  
658 GraphPad Software, San Diego California USA, ([www.graphpad.com](http://www.graphpad.com)).

659

660 **TMT-based proteomics.**

661 **Sample preparation, digestion, and TMT labeling.**

662 The PNS and MAM fractions were isolated from HEK293T WT or UBXD8 KO cells. 100 µg protein  
663 from each sample was precipitated using 15% (v/v) Trichloroacetic acid (TCA) followed by 100%  
664 Acetone washes. The protein pellets were resuspended in 200 mM N-(2-Hydroxyethyl)piperazine-  
665 N'-(3-propanesulfonic acid) (EPPS) (pH 8.5) buffer followed by reduction using 5 mM tris(2-  
666 carboxyethyl)phosphine (TCEP), alkylation with 14 mM iodoacetamide and quenched using 5 mM  
667 dithiothreitol treatments. The reduced and alkylated protein was precipitated using methanol and  
668 chloroform. The protein mixture was digested with LysC (Wako) overnight followed by Trypsin  
669 (Pierce) digestion for 6 hours at 37°C. The trypsin was inactivated with 30% (v/v) acetonitrile. The  
670 digested peptides were labelled with 0.2 mg per reaction of 6-plex TMT reagents (ThermoFisher  
671 scientific) (126, 127N, 127C, 128N, 128C, and 129N) at room temperature for 1 hour. The reaction  
672 was quenched using 0.5% (v/v) Hydroxylamine for 15 min. A 2.5 µL aliquot from the labeling  
673 reaction was tested for labeling efficiency. TMT-labeled peptides from each sample were pooled  
674 together at a 1:1 ratio. The pooled peptide mix was dried under vacuum and resuspended in 5%  
675 formic acid for 15 min. The resuspended peptide sample was further purified using C18 solid-  
676 phase extraction (SPE) (Sep-Pak, Waters).

677 **Off-line basic pH reverse-phase (BPRP) fractionation.**

678 We fractionated the pooled, labeled peptide sample using BPRP HPLC<sup>59</sup>. We used an Agilent  
679 1200 pump equipped with a degasser and a detector (set at 220 and 280 nm wavelength).  
680 Peptides were subjected to a 50-min linear gradient from 5% to 35% acetonitrile in 10 mM  
681 ammonium bicarbonate pH 8 at a flow rate of 0.6 mL/min over an Agilent 300Extend C18 column  
682 (3.5 µm particles, 4.6 mm ID and 220 mm in length). The peptide mixture was fractionated into a  
683 total of 96 fractions, which were consolidated into 24 super-fractions<sup>60</sup>. Samples were  
684 subsequently acidified with 1% formic acid and vacuum centrifuged to near dryness. Each

685 consolidated fraction was desalted via StageTip, dried again via vacuum centrifugation, and  
686 reconstituted in 5% acetonitrile, 5% formic acid for LC-MS/MS processing.

### 687 **Liquid chromatography and tandem mass spectrometry.**

688 Mass spectrometric data were collected on an Orbitrap Lumos mass spectrometer coupled to a  
689 Proxeon NanoLC-1000 UHPLC. The 100  $\mu\text{m}$  capillary column was packed with 35 cm of Accucore  
690 150 resin (2.6  $\mu\text{m}$ , 150 $\text{\AA}$ ; ThermoFisher Scientific). The scan sequence began with an MS1  
691 spectrum (Orbitrap analysis, resolution 120,000, 350–1400 Th, automatic gain control (AGC)  
692 target  $5 \times 10^5$ , maximum injection time 50 ms). Data were acquired for 150 minutes per fraction.  
693 SPS-MS3 analysis was used to reduce ion interference<sup>61,62</sup>. MS2 analysis consisted of collision-  
694 induced dissociation (CID), quadrupole ion trap analysis, automatic gain control (AGC)  $1 \times 10^4$ ,  
695 NCE (normalized collision energy) 35, q-value 0.25, maximum injection time 60 ms), isolation  
696 window at 0.5 Th. Following acquisition of each MS2 spectrum, we collected an MS3 spectrum in  
697 which multiple MS2 fragment ions were captured in the MS3 precursor population using isolation  
698 waveforms with multiple frequency notches. MS3 precursors were fragmented by HCD and  
699 analyzed using the Orbitrap (NCE 65, AGC  $3.0 \times 10^5$ , isolation window 1.3 Th, maximum injection  
700 time 150 ms, resolution was 50,000).

### 701 **Data analysis.**

702 Spectra were converted to mzXML via MSconvert<sup>63</sup>. Database searching included all entries from  
703 the Human UniProt Database (downloaded: August 2018). The database was concatenated with  
704 one composed of all protein sequences for that database in the reversed order. Searches were  
705 performed using a 50-ppm precursor ion tolerance for total protein level profiling. The product ion  
706 tolerance was set to 0.9 Da. These wide mass tolerance windows were chosen to maximize  
707 sensitivity in conjunction with Comet searches and linear discriminant analysis<sup>64,65</sup>. TMT tags on  
708 lysine residues and peptide N-termini (+229.163 Da for TMT) and carbamidomethylation of  
709 cysteine residues (+57.021 Da) were set as static modifications, while oxidation of methionine

710 residues (+15.995 Da) was set as a variable modification. Peptide-spectrum matches (PSMs)  
711 were adjusted to a 1% false discovery rate (FDR)<sup>66,67</sup>. PSM filtering was performed using a linear  
712 discriminant analysis, as described previously<sup>65</sup> and then assembled further to a final protein-level  
713 FDR of 1%<sup>67</sup>. Proteins were quantified by summing reporter ion counts across all matching PSMs,  
714 also as described previously<sup>68</sup>. Reporter ion intensities were adjusted to correct for the isotopic  
715 impurities of the different TMT reagents according to manufacturer specifications. The signal-to-  
716 noise (S/N) measurements of peptides assigned to each protein were summed and these values  
717 were normalized so that the sum of the signal for all proteins in each channel was equivalent to  
718 account for equal protein loading. Finally, each protein abundance measurement was scaled,  
719 such that the summed signal-to-noise for that protein across all channels equaled 100, thereby  
720 generating a relative abundance (RA) measurement.

721 Downstream data analyses for TMT datasets were carried out using the R statistical package  
722 (v4.0.3) and Bioconductor (v3.12; BiocManager 1.30.10). TMT channel intensities were quantile  
723 normalized and then the data were log-transformed. The log transformed data were analyzed with  
724 limma-based R package where p-values were FDR adjusted using an empirical Bayesian  
725 statistical. Differentially expressed proteins were determined using a log<sub>2</sub> (fold change (WT vs  
726 UBXD8 KO)) threshold of > +/- 0.7.

#### 727 **Gene ontology (GO) functional enrichment analyses of proteomics data.**

728 The differentially expressed proteins were further annotated and GO functional enrichment  
729 analysis was performed using Metascape online tool (<http://metascape.org>)<sup>51</sup>. The GO cluster  
730 network and protein-protein interaction network generated by metascape and the STRING  
731 database (<https://string-db.org/>), respectively, were imported into Cytoscape software (v3.8.2) to  
732 add required attributes (fold changes, p-values, gene number, and conditions) and prepared for  
733 the visualization. Other proteomic data visualizations were performed using the RStudio software  
734 (v1.4.1103), including hrbthemes (v0.8.0), viridis (v0.6.1), dplyr (v.1.0.7), and ggplot2 (v 3.3.5).

735

## 736 **Lipidomics**

### 737 **Sample preparation, mass spectrometry, and identification.**

738 For each independent lipidomic experiment, HEK293T WT and UBXD8 KO cells were seeded in  
739 triplicate. Two of the three samples for each condition were used for lipidomics (i.e., lipids from  
740 duplicate samples were extracted and analyzed in parallel to determine technical variation). The  
741 third sample was used to determine the total protein concentration. Cells were washed with PBS,  
742 scraped into cold 50% methanol, centrifuged, and the cell pellets were frozen. Next, cells were  
743 resuspended in cold 50% methanol and transferred to glass vials. Chloroform was added and the  
744 mixture was gently vortexed and centrifuged at 1,000x g for 5 min at 4°C. Lipids were transferred  
745 to a clean glass vial using a glass Hamilton syringe. Lipids were extracted twice using chloroform  
746 prior to being dried under nitrogen gas. Samples were normalized according to protein  
747 concentration when resuspended in a 1:1:1 solution of methanol:chloroform:isopropanol prior to  
748 mass spectrometry (MS) analysis. The samples were stored at 4°C in an autosampler during data  
749 collection.

750 Lipids were identified and quantitatively measured using ultra high-performance liquid-  
751 chromatography high-resolution tandem MS/MS (UHPLC-MS/MS) as recently described<sup>69,70</sup>.  
752 Separation of lipids was done by reverse-phase chromatography using a Kinetex 2.6 µm C18  
753 column (Phenomenex 00F-4462-AN) at 60°C using a Vanquish UHPLC system (Thermo  
754 Scientific) and two solvents: solvent A (40:60 water-methanol plus 10mM ammonium formate and  
755 0.1% formic acid) and solvent B (10:90 methanol-isopropanol plus 10mM ammonium formate and  
756 0.1% formic acid). UHPLC was performed at a 0.25 ml per min flow rate for 30 min per sample,  
757 starting at 25% solvent B and ending at 100% solvent B as described. The column was washed  
758 and equilibrated between samples. Samples were run in a semi-random order where WT or  
759 UBXD8 KO samples were interspersed with blank samples. Lipids were ionized using a heated  
760 electrospray ionization (HESI) source and nitrogen gas and measured using a Q-Exactive Plus

761 mass spectrometer operating at a MS1 resolution of either 70,000 or 140,000 and a MS2  
762 resolution of 35,000. MS1 Spectra were collected over a mass range of 200 to 1,600 m/z with an  
763 automatic gain control (AGC) setting of 1e6 and transient times of 250 ms (70,000 resolution) or  
764 520 ms (140,000 resolution). MS2 spectra were collected using a transient time of 120 ms and  
765 an AGC setting of 1e5. Each sample was analyzed using negative and positive ion modes. The  
766 mass analyzer was calibrated weekly. SPLASH LIPIDOMIX mass spectrometry standards (Avanti  
767 Polar Lipids) were used in determining extraction efficiencies and lipid quantitation. Quality control  
768 (QC) samples consisting of lipids extracted from the National Institute of Standards and  
769 Technology (NIST) Standard Reference Material 1950 Metabolites in Frozen Human Plasma  
770 which contains plasma pooled from 100 healthy donors were used in this study. In parallel to the  
771 samples, a control that lacked cells was used to determine any contaminants from the lipid  
772 extraction and measurement steps. Any lipids found in the no cell control were removed during  
773 analysis steps.

774 Lipids were identified and quantified using MAVEN<sup>71</sup>, EI-MAVEN (Elucidata), Xcalibur  
775 (ThermoFisher Scientific), and LipidSearch software (ThermoFisher Scientific). UHPLC retention  
776 time, MS<sup>1</sup> peaks, and MS<sup>2</sup> fragments were used to identify lipids. The lipid retention time, MS1  
777 peak shape, isotopic distribution, and MS<sup>2</sup> fragments were visually confirmed for all lipids reported  
778 in this study. Peak area was used to determine lipid abundance. Lipids were included if they  
779 were observed in 3-6 samples in both UBXD8 KO and WT cells. Missing values in a sample were  
780 not imputed. The fold change of each lipid in UBXD8 KO cells relative to its level in WT cells was  
781 used to test for statistical difference between UBXD8 KO and WT cells using independent t-tests  
782 and the Benjamini-Hochberg correction method to control for false statistical discovery. The  
783 following lipid classes were included in the analysis: cholesteryl esters (CE), diacylglycerol (DG),  
784 phosphatidylcholine (PC), phosphatidylethanolamine (PE), phosphatidylglycerol (PG),  
785 phosphatidylinositol (PI), phosphatidylserine (PS), and triacylglycerol (TG). Guidelines from the  
786 Lipidomic Standards Initiative were followed for lipid species identification and quantification,

787 including consideration of isotopic patterns resulting from naturally occurring  $^{13}\text{C}$  atoms and  
788 isomeric overlap. The following MS<sup>2</sup> information was used to confirm each lipid species: PC  
789 fragment of 184.073 (positive mode) and tail identification using formic adduct (negative mode);  
790 PE fragment of 196.038 or the tail plus 197.046 (negative mode) and neutral loss (NL) of 141.019  
791 (positive mode); PG fragment of 152.996 plus the identification of the FA tails (negative mode)  
792 and NL 189.04 of [M+NH<sub>4</sub>]<sup>+</sup> adduct (positive mode); PI fragment of 241.012 (negative) and NL  
793 277.056 of [M+NH<sub>4</sub>]<sup>+</sup> adduct (positive mode); PS NL of 87.032 (negative); DG and TG by NL of  
794 FA tails (positive mode); and CE fragment of 369.352 or neutral loss of 368.35 (positive).

795

### 796 **Mouse studies**

797 C57BL/6 (stock No.: 000664) and p97<sup>R155H/WT</sup> (B6;129S-Vcptm11tl/J, Stock No: 021968) were  
798 purchased from Jackson Laboratory. p97<sup>R155C/WT</sup> and p97 cKO (VCPFL/FL; CaMKIIa-Cre) were  
799 obtained as reported previously<sup>39,40</sup>. All mice utilized in the study were on a C57BL/6 background.  
800 Both male and female mice were used in this study. Animal procedures were performed in  
801 accordance with protocols approved by the Animal Studies Committee at Washington University  
802 School of Medicine.

### 803 **Immunohistochemistry of tissue sections**

804 Mice were anesthetized in an isoflurane chamber and perfused with PBS containing heparin. The  
805 whole brain was removed from the skull and fixed in 4% PFA overnight at 4 °C degrees, cut  
806 coronally into 40 micrometer sections, and stored in cryoprotectant solution at 4 °C degree for  
807 staining. Sections were first rinsed 3 times with TBS and then blocked with blocking solution for  
808 30 minutes (5% normal goat serum with 0.1% Triton X-100 in TBS). Sections were stained with  
809 the primary antibody (SREBP1, 1:500, SCD1: 1:250 dilution) in TBS-0.1% Triton X-100 plus 2%  
810 normal goat serum at 4 °C overnight, followed by 3 washes with TBS. Sections were then  
811 incubated with the Alexa 488 and 555 tagged secondary antibodies (1:1000) for 2 hours at room  
812 temperature, followed by counterstaining with DAPI (1:1000) for 20 min. After three washes with



813 TBS, the sections were mounted on the glass slides. True black (Biotium, NC1125051) was  
814 incubated with the sections for 5 minutes to quench the auto-fluorescence. Slides were cover-  
815 slipped using Prolong Gold mounting medium. Images were acquired using a Nikon Eclipse 80i  
816 fluorescence microscope. All images were taken with the same fluorescent settings and  
817 subsequently adjusted equally for brightness and contrast to ensure accurate pathology  
818 quantification. For CA1 regions, ROIs are drawn according to DAPI staining and the mean  
819 intensity was measured in each ROI by ImageJ. Background intensities (from three regions per  
820 image were subtracted.

### 821 **Immunoblot**

822 Mouse cortex was lysed in RIPA buffer with protease inhibitor cocktails (PMSF and PIC) followed  
823 by sonication (two cycles of 30 seconds cycles at 50% power). The protein concentration is  
824 estimated by the BCA assay. Samples were loaded into 10% gel and transferred into  
825 nitrocellulose membrane. The membranes were blocked by 5% milk in PBS-0.2% Tween20 and  
826 incubated with the primary antibody in blocking solution overnight at 4 °C degrees. The membrane  
827 was then washed three times with PBS-0.2% Tween20 and incubated with a secondary goat anti-  
828 rabbit HRP antibody (1:5000) for 1 hour. Blot was rinsed three times with PBS-0.2% Tween20  
829 and probed by a fresh mixture of ECL reagents at dark and then exposed by SYNGENE.

830

### 831 **Statistical analyses.**

832 For all experiments,  $N \geq 3$  biological replicates for each condition were examined. Fold changes,  
833 SEM, and statistical analyses were performed using GraphPad Prism version 5.01 for Windows,  
834 GraphPad Software, San Diego California USA ([www.graphpad.com](http://www.graphpad.com)). The Statistical tests  
835 performed, SEM, and statistical significance values are mentioned in the figures and  
836 supplementary tables.

837

### 838 **Acknowledgements**

839 We thank Peter Juo and Karl Munger for critical reading of the manuscript. We are grateful to  
840 Jeffrey Golden (Brigham and Women's Hospital, Harvard Medical School) for split luciferase  
841 constructs, and the Whitehead Institute Electron Microscopy core for electron microscopy. We  
842 would also like to thank Jacob Klickstein for developing the ImageJ script for ER-mitochondria co-  
843 localization. This work is supported by the NIH grant GM127557 to M.R., funds from the University  
844 of Arizona Health Sciences and BIO5 Institute to J.G.P., and NIH grant AG031867 to C.C.W.

845

#### 846 **Respective Contributions**

847 R.G and M.R conceived the studies. R.G performed all experiments except for lipidomics studies  
848 (that were performed by Y.X. and J.G.P. and analyzed by Y.X., I.K. and J.G.P.) and mouse  
849 immunohistochemistry and immunoblotting (that were performed by J.Z). J.P and S.P.G assisted  
850 with proteomic studies. M.R wrote the manuscript with input from R.G and J.G.P and C.C.W.

851

#### 852 **Competing Interests**

853 The authors declare no conflicts of interest.

854

#### 855 **Request for reagents**

856 Please contact the corresponding author, M.R for reagent requests.

857

#### 858 **Data availability**

859 All raw proteomic and lipidomic data will be made available on public servers upon acceptance of  
860 the manuscript. Any other data is available from the corresponding author upon request.

861

#### 862 **Code availability**

863 The ImageJ macro to quantify ER-mitochondria contact sites will be made available on Github  
864 upon manuscript acceptance.

## 865 References

- 866 1 Rowland, A. A. & Voeltz, G. K. Endoplasmic reticulum-mitochondria contacts: function of  
867 the junction. *Nat Rev Mol Cell Biol* **13**, 607-625, doi:10.1038/nrm3440 (2012).
- 868 2 Barazzuol, L., Giamogante, F. & Cali, T. Mitochondria Associated Membranes (MAMs):  
869 Architecture and physiopathological role. *Cell Calcium* **94**, 102343,  
870 doi:10.1016/j.ceca.2020.102343 (2021).
- 871 3 Vance, J. E. MAM (mitochondria-associated membranes) in mammalian cells: lipids and  
872 beyond. *Biochim Biophys Acta* **1841**, 595-609, doi:10.1016/j.bbalip.2013.11.014 (2014).
- 873 4 Kornmann, B. [ERMES, a multifunctional complex connecting endoplasmic reticulum and  
874 mitochondria]. *Med Sci (Paris)* **26**, 145-146, doi:10.1051/medsci/2010262145 (2010).
- 875 5 de Brito, O. M. & Scorrano, L. Mitofusin 2 tethers endoplasmic reticulum to mitochondria.  
876 *Nature* **456**, 605-610, doi:10.1038/nature07534 (2008).
- 877 6 Kornmann, B. & Walter, P. ERMES-mediated ER-mitochondria contacts: molecular hubs  
878 for the regulation of mitochondrial biology. *J Cell Sci* **123**, 1389-1393,  
879 doi:10.1242/jcs.058636 (2010).
- 880 7 De Vos, K. J. *et al.* VAPB interacts with the mitochondrial protein PTPIP51 to regulate  
881 calcium homeostasis. *Hum Mol Genet* **21**, 1299-1311, doi:10.1093/hmg/ddr559 (2012).
- 882 8 Chandra, D. *et al.* Association of active caspase 8 with the mitochondrial membrane during  
883 apoptosis: potential roles in cleaving BAP31 and caspase 3 and mediating mitochondrion-  
884 endoplasmic reticulum cross talk in etoposide-induced cell death. *Mol Cell Biol* **24**, 6592-  
885 6607, doi:10.1128/mcb.24.15.6592-6607.2004 (2004).
- 886 9 Rapizzi, E. *et al.* Recombinant expression of the voltage-dependent anion channel  
887 enhances the transfer of Ca<sup>2+</sup> microdomains to mitochondria. *J Cell Biol* **159**, 613-624,  
888 doi:10.1083/jcb.200205091 (2002).
- 889 10 Preston, G. M. & Brodsky, J. L. The evolving role of ubiquitin modification in endoplasmic  
890 reticulum-associated degradation. *Biochem J* **474**, 445-469, doi:10.1042/bcj20160582  
891 (2017).
- 892 11 Song, J., Herrmann, J. M. & Becker, T. Quality control of the mitochondrial proteome. *Nat*  
893 *Rev Mol Cell Biol* **22**, 54-70, doi:10.1038/s41580-020-00300-2 (2021).
- 894 12 Meyer, H. p97 complexes as signal integration hubs. *BMC Biol* **10**, 48, doi:10.1186/1741-  
895 7007-10-48 (2012).
- 896 13 Ganji, R., Mukkavalli, S., Somanji, F. & Raman, M. The VCP-UBXN1 Complex Mediates  
897 Triage of Ubiquitylated Cytosolic Proteins Bound to the BAG6 Complex. *Mol Cell Biol* **38**,  
898 doi:10.1128/MCB.00154-18 (2018).
- 899 14 Tanaka, A. *et al.* Proteasome and p97 mediate mitophagy and degradation of mitofusins  
900 induced by Parkin. *J Cell Biol* **191**, 1367-1380, doi:10.1083/jcb.201007013 (2010).
- 901 15 Alexandru, G. *et al.* UBXD7 binds multiple ubiquitin ligases and implicates p97 in  
902 HIF1 $\alpha$  turnover. *Cell* **134**, 804-816, doi:10.1016/j.cell.2008.06.048 (2008).
- 903 16 Raman, M. *et al.* Systematic proteomics of the VCP-UBXD adaptor network identifies a  
904 role for UBXN10 in regulating ciliogenesis. *Nat Cell Biol* **17**, 1356-1369,  
905 doi:10.1038/ncb3238 (2015).
- 906 17 Williamson, C. D., Wong, D. S., Bozidis, P., Zhang, A. & Colberg-Poley, A. M. Isolation of  
907 Endoplasmic Reticulum, Mitochondria, and Mitochondria-Associated Membrane and  
908 Detergent Resistant Membrane Fractions from Transfected Cells and from Human  
909 Cytomegalovirus-Infected Primary Fibroblasts. *Curr Protoc Cell Biol* **68**, 3.27.21-23.27.33,  
910 doi:10.1002/0471143030.cb0327s68 (2015).
- 911 18 Cho, I. T. *et al.* Ascorbate peroxidase proximity labeling coupled with biochemical  
912 fractionation identifies promoters of endoplasmic reticulum-mitochondrial contacts. *J Biol*  
913 *Chem* **292**, 16382-16392, doi:10.1074/jbc.M117.795286 (2017).

- 914 19 Kim, H. *et al.* UAS domain of Ubxd8 and FAF1 polymerizes upon interaction with long-  
915 chain unsaturated fatty acids. *J Lipid Res* **54**, 2144-2152, doi:10.1194/jlr.M037218 (2013).
- 916 20 Xu, Y., Liu, Y., Lee, J. G. & Ye, Y. A ubiquitin-like domain recruits an oligomeric chaperone  
917 to a retrotranslocation complex in endoplasmic reticulum-associated degradation. *J Biol*  
918 *Chem* **288**, 18068-18076, doi:10.1074/jbc.M112.449199 (2013).
- 919 21 Ting, L., Rad, R., Gygi, S. P. & Haas, W. MS3 eliminates ratio distortion in isobaric  
920 multiplexed quantitative proteomics. *Nat Methods* **8**, 937-940, doi:10.1038/nmeth.1714  
921 (2011).
- 922 22 McAlister, G. C. *et al.* MultiNotch MS3 enables accurate, sensitive, and multiplexed  
923 detection of differential expression across cancer cell line proteomes. *Anal Chem* **86**,  
924 7150-7158, doi:10.1021/ac502040v (2014).
- 925 23 Hung, V. *et al.* Proteomic mapping of cytosol-facing outer mitochondrial and ER  
926 membranes in living human cells by proximity biotinylation. *Elife* **6**,  
927 doi:10.7554/eLife.24463 (2017).
- 928 24 Kwak, C. *et al.* Contact-ID, a tool for profiling organelle contact sites, reveals regulatory  
929 proteins of mitochondrial-associated membrane formation. *Proc Natl Acad Sci U S A* **117**,  
930 12109-12120, doi:10.1073/pnas.1916584117 (2020).
- 931 25 Cho, K. F. *et al.* Split-TurboID enables contact-dependent proximity labeling in cells. *Proc*  
932 *Natl Acad Sci U S A* **117**, 12143-12154, doi:10.1073/pnas.1919528117 (2020).
- 933 26 Olzmann, J. A., Richter, C. M. & Kopito, R. R. Spatial regulation of UBXD8 and p97/VCP  
934 controls ATGL-mediated lipid droplet turnover. *Proc Natl Acad Sci U S A* **110**, 1345-1350,  
935 doi:10.1073/pnas.1213738110 (2013).
- 936 27 Vance, J. E. Phospholipid synthesis in a membrane fraction associated with mitochondria.  
937 *J Biol Chem* **265**, 7248-7256 (1990).
- 938 28 Ikeda, Y. *et al.* Regulated endoplasmic reticulum-associated degradation of a polytopic  
939 protein: p97 recruits proteasomes to Insig-1 before extraction from membranes. *J Biol*  
940 *Chem* **284**, 34889-34900, doi:10.1074/jbc.M109.044875 (2009).
- 941 29 Horton, J. D., Goldstein, J. L. & Brown, M. S. SREBPs: activators of the complete program  
942 of cholesterol and fatty acid synthesis in the liver. *J Clin Invest* **109**, 1125-1131,  
943 doi:10.1172/jci15593 (2002).
- 944 30 Surma, M. A. *et al.* A lipid E-MAP identifies Ubx2 as a critical regulator of lipid saturation  
945 and lipid bilayer stress. *Mol Cell* **51**, 519-530, doi:10.1016/j.molcel.2013.06.014 (2013).
- 946 31 Hayashi, T. & Fujimoto, M. Detergent-resistant microdomains determine the localization  
947 of sigma-1 receptors to the endoplasmic reticulum-mitochondria junction. *Mol Pharmacol*  
948 **77**, 517-528, doi:10.1124/mol.109.062539 (2010).
- 949 32 Park, W. J. *et al.* A novel FADS1 isoform potentiates FADS2-mediated production of  
950 eicosanoid precursor fatty acids. *J Lipid Res* **53**, 1502-1512, doi:10.1194/jlr.M025312  
951 (2012).
- 952 33 Bai, Y. *et al.* X-ray structure of a mammalian stearyl-CoA desaturase. *Nature* **524**, 252-  
953 256, doi:10.1038/nature14549 (2015).
- 954 34 Léger, S. *et al.* Synthesis and biological activity of a potent and orally bioavailable SCD  
955 inhibitor (MF-438). *Bioorg Med Chem Lett* **20**, 499-502, doi:10.1016/j.bmcl.2009.11.111  
956 (2010).
- 957 35 Watts, G. D. *et al.* Novel VCP mutations in inclusion body myopathy associated with Paget  
958 disease of bone and frontotemporal dementia. *Clin Genet* **72**, 420-426,  
959 doi:10.1111/j.1399-0004.2007.00887.x (2007).
- 960 36 Johnson, J. O. *et al.* Exome sequencing reveals VCP mutations as a cause of familial  
961 ALS. *Neuron* **68**, 857-864, doi:10.1016/j.neuron.2010.11.036 (2010).
- 962 37 Abramzon, Y. *et al.* Valosin-containing protein (VCP) mutations in sporadic amyotrophic  
963 lateral sclerosis. *Neurobiol Aging* **33**, 2231 e2231-2231 e2236,  
964 doi:10.1016/j.neurobiolaging.2012.04.005 (2012).

- 965 38 Gonzalez, M. A. *et al.* A novel mutation in VCP causes Charcot-Marie-Tooth Type 2  
966 disease. *Brain* **137**, 2897-2902, doi:10.1093/brain/awu224 (2014).
- 967 39 Wani, A. *et al.* Neuronal VCP loss of function recapitulates FTLD-TDP pathology. *Cell Rep*  
968 **36**, 109399, doi:10.1016/j.celrep.2021.109399 (2021).
- 969 40 Clemen, C. S. *et al.* The heterozygous R155C VCP mutation: Toxic in humans! Harmless  
970 in mice? *Biochem Biophys Res Commun* **503**, 2770-2777, doi:10.1016/j.bbrc.2018.08.038  
971 (2018).
- 972 41 Loregger, A. *et al.* Haploid Mammalian Genetic Screen Identifies UBXD8 as a Key  
973 Determinant of HMGCR Degradation and Cholesterol Biosynthesis. *Arterioscler Thromb*  
974 *Vasc Biol* **37**, 2064-2074, doi:10.1161/atvbaha.117.310002 (2017).
- 975 42 Schrul, B. & Kopito, R. R. Peroxin-dependent targeting of a lipid-droplet-destined  
976 membrane protein to ER subdomains. *Nat Cell Biol* **18**, 740-751, doi:10.1038/ncb3373  
977 (2016).
- 978 43 Kolawa, N. *et al.* Perturbations to the ubiquitin conjugate proteome in yeast  $\delta$ ubx mutants  
979 identify Ubx2 as a regulator of membrane lipid composition. *Mol Cell Proteomics* **12**, 2791-  
980 2803, doi:10.1074/mcp.M113.030163 (2013).
- 981 44 Nahar, S., Chowdhury, A., Ogura, T. & Esaki, M. A AAA ATPase Cdc48 with a cofactor  
982 Ubx2 facilitates ubiquitylation of a mitochondrial fusion-promoting factor Fzo1 for  
983 proteasomal degradation. *J Biochem* **167**, 279-286, doi:10.1093/jb/mvz104 (2020).
- 984 45 Chowdhury, A., Ogura, T. & Esaki, M. Two Cdc48 cofactors Ubp3 and Ubx2 regulate  
985 mitochondrial morphology and protein turnover. *J Biochem* **164**, 349-358,  
986 doi:10.1093/jb/mvy057 (2018).
- 987 46 Mårtensson, C. U. *et al.* Mitochondrial protein translocation-associated degradation.  
988 *Nature* **569**, 679-683, doi:10.1038/s41586-019-1227-y (2019).
- 989 47 Rieusset, J. Contribution of mitochondria and endoplasmic reticulum dysfunction in insulin  
990 resistance: Distinct or interrelated roles? *Diabetes Metab* **41**, 358-368,  
991 doi:10.1016/j.diabet.2015.02.006 (2015).
- 992 48 Xu, L., Wang, X. & Tong, C. Endoplasmic Reticulum-Mitochondria Contact Sites and  
993 Neurodegeneration. *Front Cell Dev Biol* **8**, 428, doi:10.3389/fcell.2020.00428 (2020).
- 994 49 Marchi, S. *et al.* Oncogenic and oncosuppressive signal transduction at mitochondria-  
995 associated endoplasmic reticulum membranes. *Mol Cell Oncol* **1**, e956469,  
996 doi:10.4161/23723548.2014.956469 (2014).
- 997 50 Hall, C. E. *et al.* Progressive Motor Neuron Pathology and the Role of Astrocytes in a  
998 Human Stem Cell Model of VCP-Related ALS. *Cell Rep* **19**, 1739-1749,  
999 doi:10.1016/j.celrep.2017.05.024 (2017).
- 1000 51 Zhou, Y. *et al.* Metascape provides a biologist-oriented resource for the analysis of  
1001 systems-level datasets. *Nat Commun* **10**, 1523, doi:10.1038/s41467-019-09234-6 (2019).
- 1002 52 Filadi, R. *et al.* Mitofusin 2 ablation increases endoplasmic reticulum-mitochondria  
1003 coupling. *Proc Natl Acad Sci U S A* **112**, E2174-2181, doi:10.1073/pnas.1504880112  
1004 (2015).
- 1005 53 Raman, M., Havens, C. G., Walter, J. C. & Harper, J. W. A genome-wide screen identifies  
1006 p97 as an essential regulator of DNA damage-dependent CDT1 destruction. *Mol Cell* **44**,  
1007 72-84, doi:10.1016/j.molcel.2011.06.036 (2011).
- 1008 54 Wieckowski, M. R., Giorgi, C., Lebiedzinska, M., Duszynski, J. & Pinton, P. Isolation of  
1009 mitochondria-associated membranes and mitochondria from animal tissues and cells. *Nat*  
1010 *Protoc* **4**, 1582-1590, doi:10.1038/nprot.2009.151 (2009).
- 1011 55 Williamson, C. D., Wong, D. S., Bozidis, P., Zhang, A. & Colberg-Poley, A. M. Isolation of  
1012 Endoplasmic Reticulum, Mitochondria, and Mitochondria-Associated Membrane and  
1013 Detergent Resistant Membrane Fractions from Transfected Cells and from Human  
1014 Cytomegalovirus-Infected Primary Fibroblasts. *Curr Protoc Cell Biol* **68**, 3 27 21-23 27 33,  
1015 doi:10.1002/0471143030.cb0327s68 (2015).

- 1016 56 Wang, Z. *et al.* Saturated fatty acids activate microglia via Toll-like receptor 4/NF-kappaB  
1017 signalling. *Br J Nutr* **107**, 229-241, doi:10.1017/S0007114511002868 (2012).
- 1018 57 Davis, O. B. *et al.* NPC1-mTORC1 Signaling Couples Cholesterol Sensing to Organelle  
1019 Homeostasis and Is a Targetable Pathway in Niemann-Pick Type C. *Dev Cell* **56**, 260-276  
1020 e267, doi:10.1016/j.devcel.2020.11.016 (2021).
- 1021 58 Lim, C. Y. *et al.* ER-lysosome contacts enable cholesterol sensing by mTORC1 and drive  
1022 aberrant growth signalling in Niemann-Pick type C. *Nat Cell Biol* **21**, 1206-1218,  
1023 doi:10.1038/s41556-019-0391-5 (2019).
- 1024 59 Wang, Y. *et al.* Reversed-phase chromatography with multiple fraction concatenation  
1025 strategy for proteome profiling of human MCF10A cells. *Proteomics* **11**, 2019-2026,  
1026 doi:10.1002/pmic.201000722 (2011).
- 1027 60 Paulo, J. A. *et al.* Quantitative mass spectrometry-based multiplexing compares the  
1028 abundance of 5000 *S. cerevisiae* proteins across 10 carbon sources. *J Proteomics* **148**,  
1029 85-93, doi:10.1016/j.jprot.2016.07.005 (2016).
- 1030 61 Gygi, J. P. *et al.* Web-Based Search Tool for Visualizing Instrument Performance Using  
1031 the Triple Knockout (TKO) Proteome Standard. *J Proteome Res* **18**, 687-693,  
1032 doi:10.1021/acs.jproteome.8b00737 (2019).
- 1033 62 Paulo, J. A., O'Connell, J. D. & Gygi, S. P. A Triple Knockout (TKO) Proteomics Standard  
1034 for Diagnosing Ion Interference in Isobaric Labeling Experiments. *J Am Soc Mass*  
1035 *Spectrom* **27**, 1620-1625, doi:10.1007/s13361-016-1434-9 (2016).
- 1036 63 Chambers, M. C. *et al.* A cross-platform toolkit for mass spectrometry and proteomics. *Nat*  
1037 *Biotechnol* **30**, 918-920, doi:10.1038/nbt.2377 (2012).
- 1038 64 Beausoleil, S. A., Villen, J., Gerber, S. A., Rush, J. & Gygi, S. P. A probability-based  
1039 approach for high-throughput protein phosphorylation analysis and site localization.  
1040 *Nature biotechnology* **24**, 1285-1292, doi:10.1038/nbt1240 (2006).
- 1041 65 Huttlin, E. L. *et al.* A tissue-specific atlas of mouse protein phosphorylation and  
1042 expression. *Cell* **143**, 1174-1189, doi:10.1016/j.cell.2010.12.001 (2010).
- 1043 66 Elias, J. E. & Gygi, S. P. Target-decoy search strategy for mass spectrometry-based  
1044 proteomics. *Methods Mol Biol* **604**, 55-71, doi:10.1007/978-1-60761-444-9\_5 (2010).
- 1045 67 Elias, J. E. & Gygi, S. P. Target-decoy search strategy for increased confidence in large-  
1046 scale protein identifications by mass spectrometry. *Nat Methods* **4**, 207-214,  
1047 doi:10.1038/nmeth1019 (2007).
- 1048 68 McAlister, G. C. *et al.* Increasing the Multiplexing Capacity of TMTs Using Reporter Ion  
1049 Isotopologues with Isobaric Masses. *Analytical Chemistry* **84**, 7469-7478,  
1050 doi:10.1021/ac301572t (2012).
- 1051 69 Xi, Y., Harwood, S., Wise, L. M. & Purdy, J. G. Human Cytomegalovirus pUL37x1 Is  
1052 Important for Remodeling of Host Lipid Metabolism. *J Virol* **93**, doi:10.1128/JVI.00843-19  
1053 (2019).
- 1054 70 Xi, Y., Lindenmayer, L., Kline, I., von Einem, J. & Purdy, J. G. Human Cytomegalovirus  
1055 Uses a Host Stress Response To Balance the Elongation of Saturated/Monounsaturated  
1056 and Polyunsaturated Very-Long-Chain Fatty Acids. *mBio* **12**, doi:10.1128/mBio.00167-21  
1057 (2021).
- 1058 71 Melamud, E., Vastag, L. & Rabinowitz, J. D. Metabolomic analysis and visualization  
1059 engine for LC-MS data. *Anal Chem* **82**, 9818-9826, doi:10.1021/ac1021166 (2010).
- 1060

**Figure 1.**

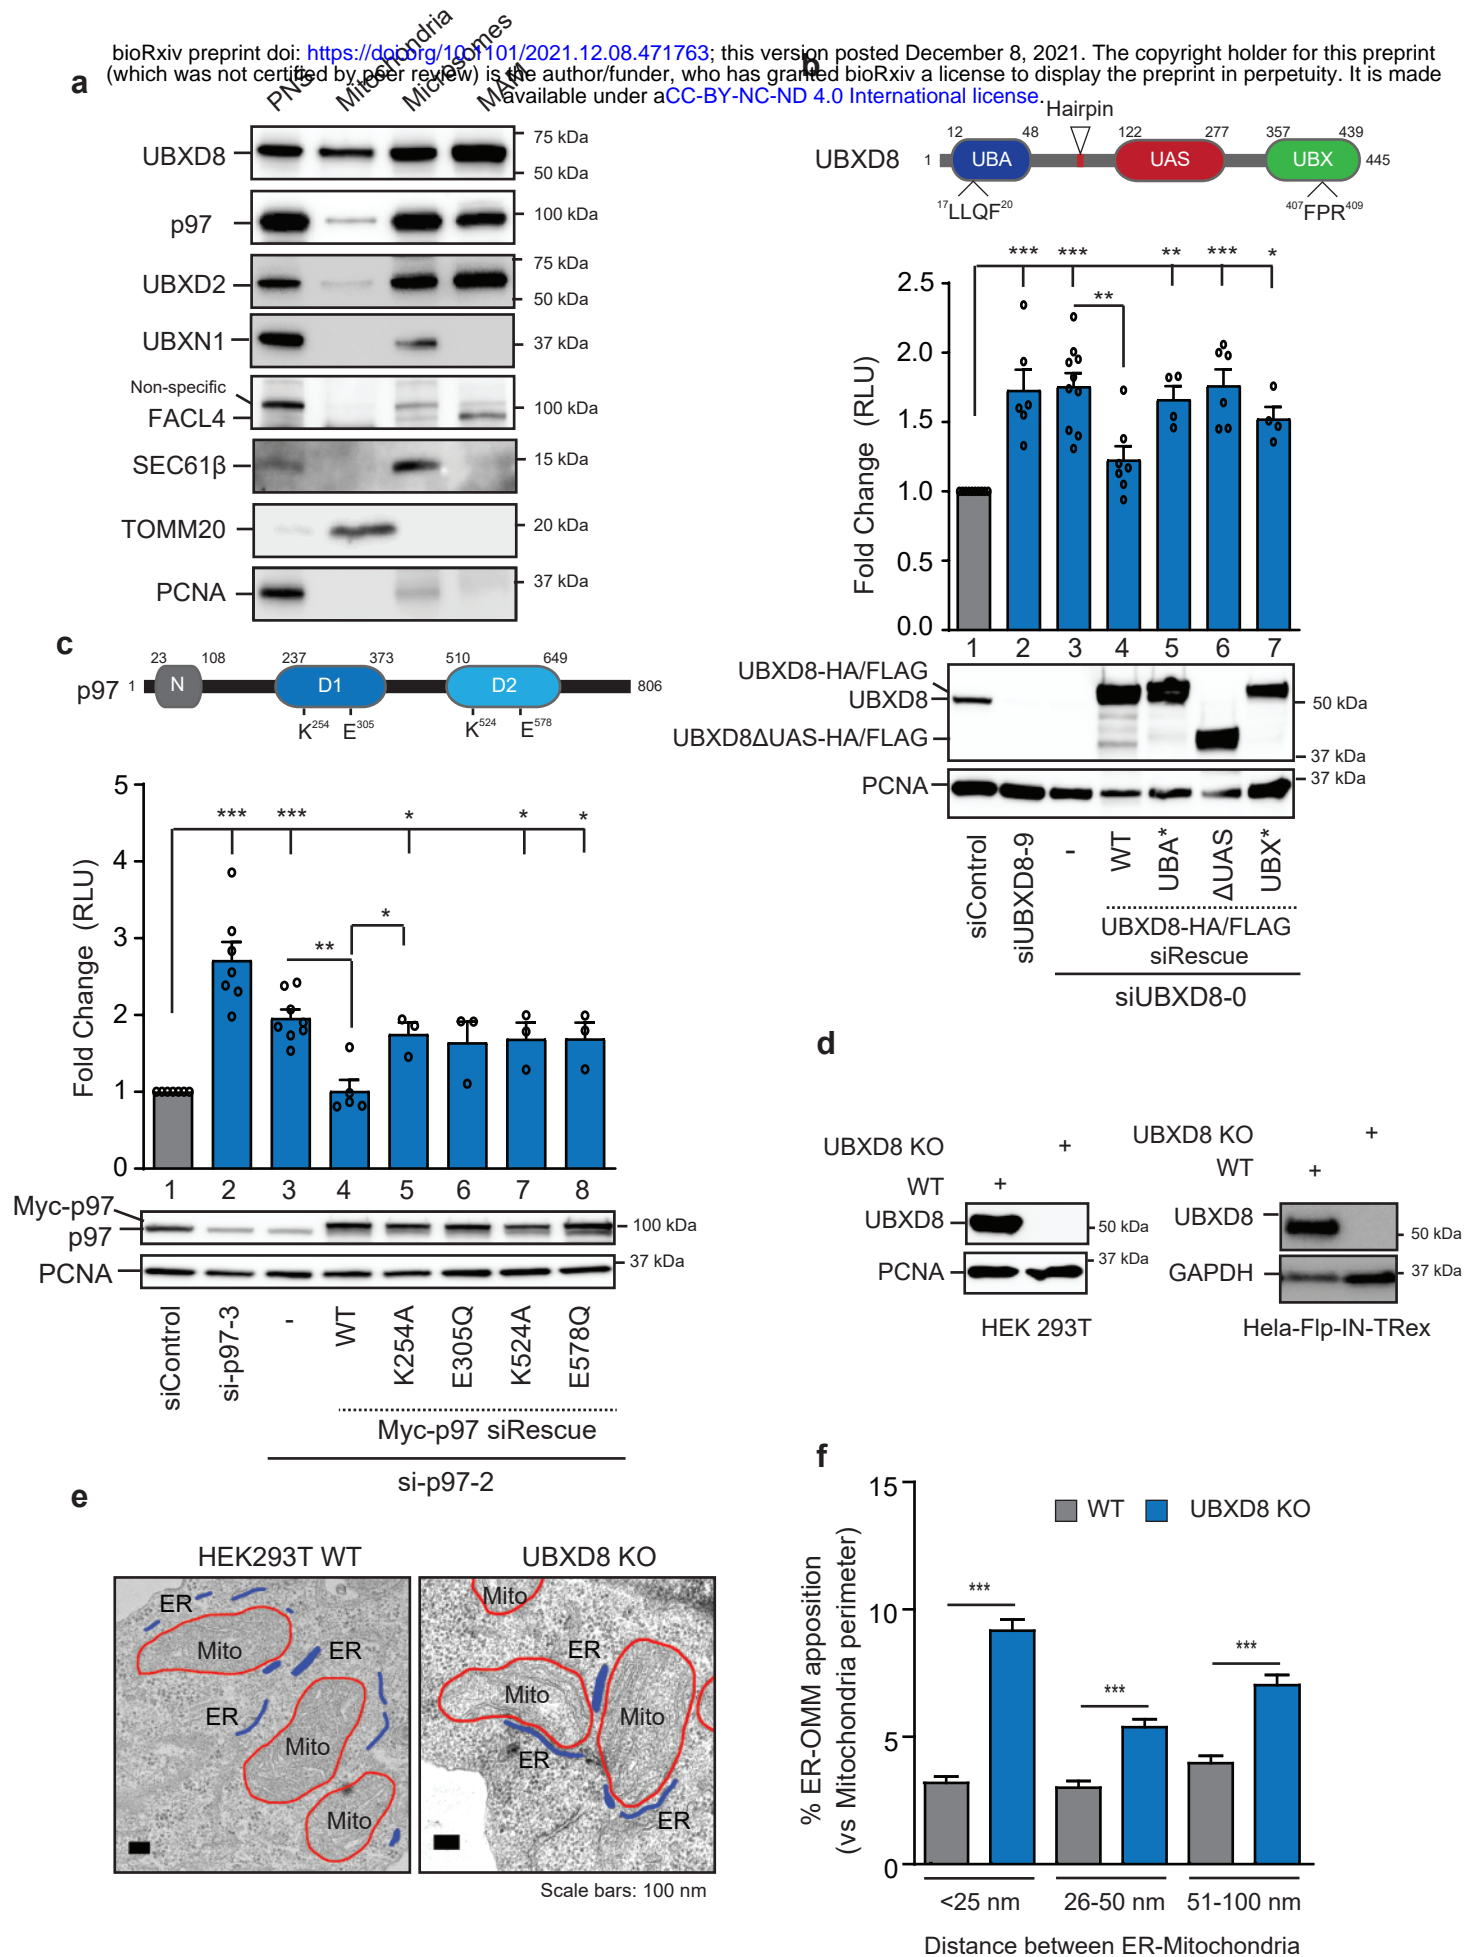

**Figure 2**

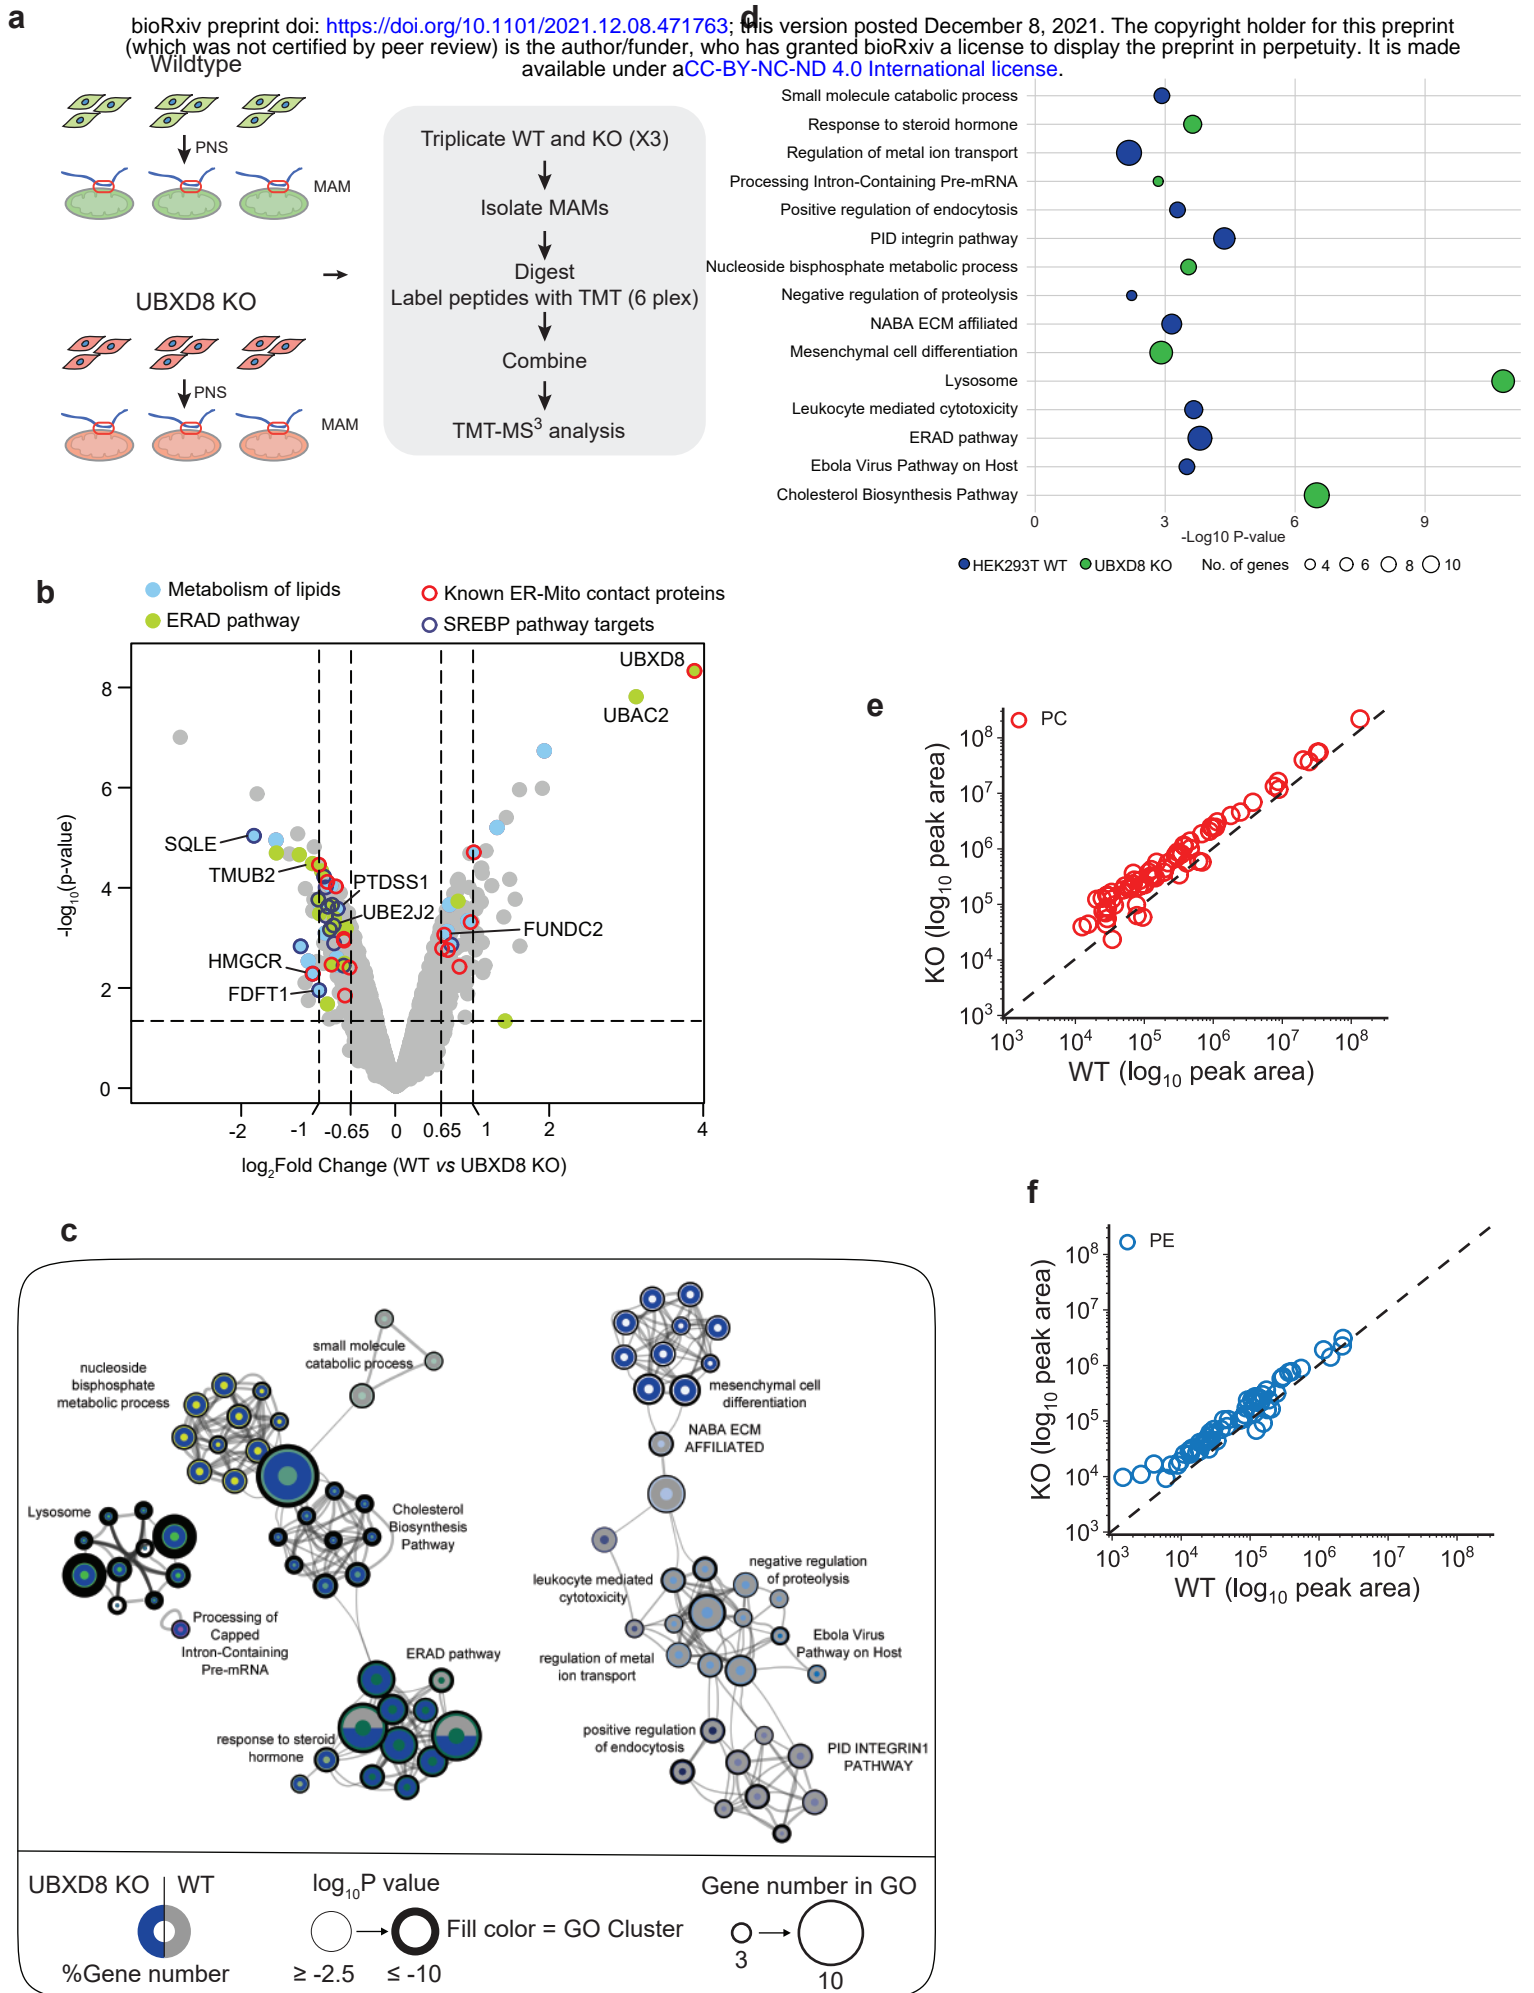



**Figure 3.**

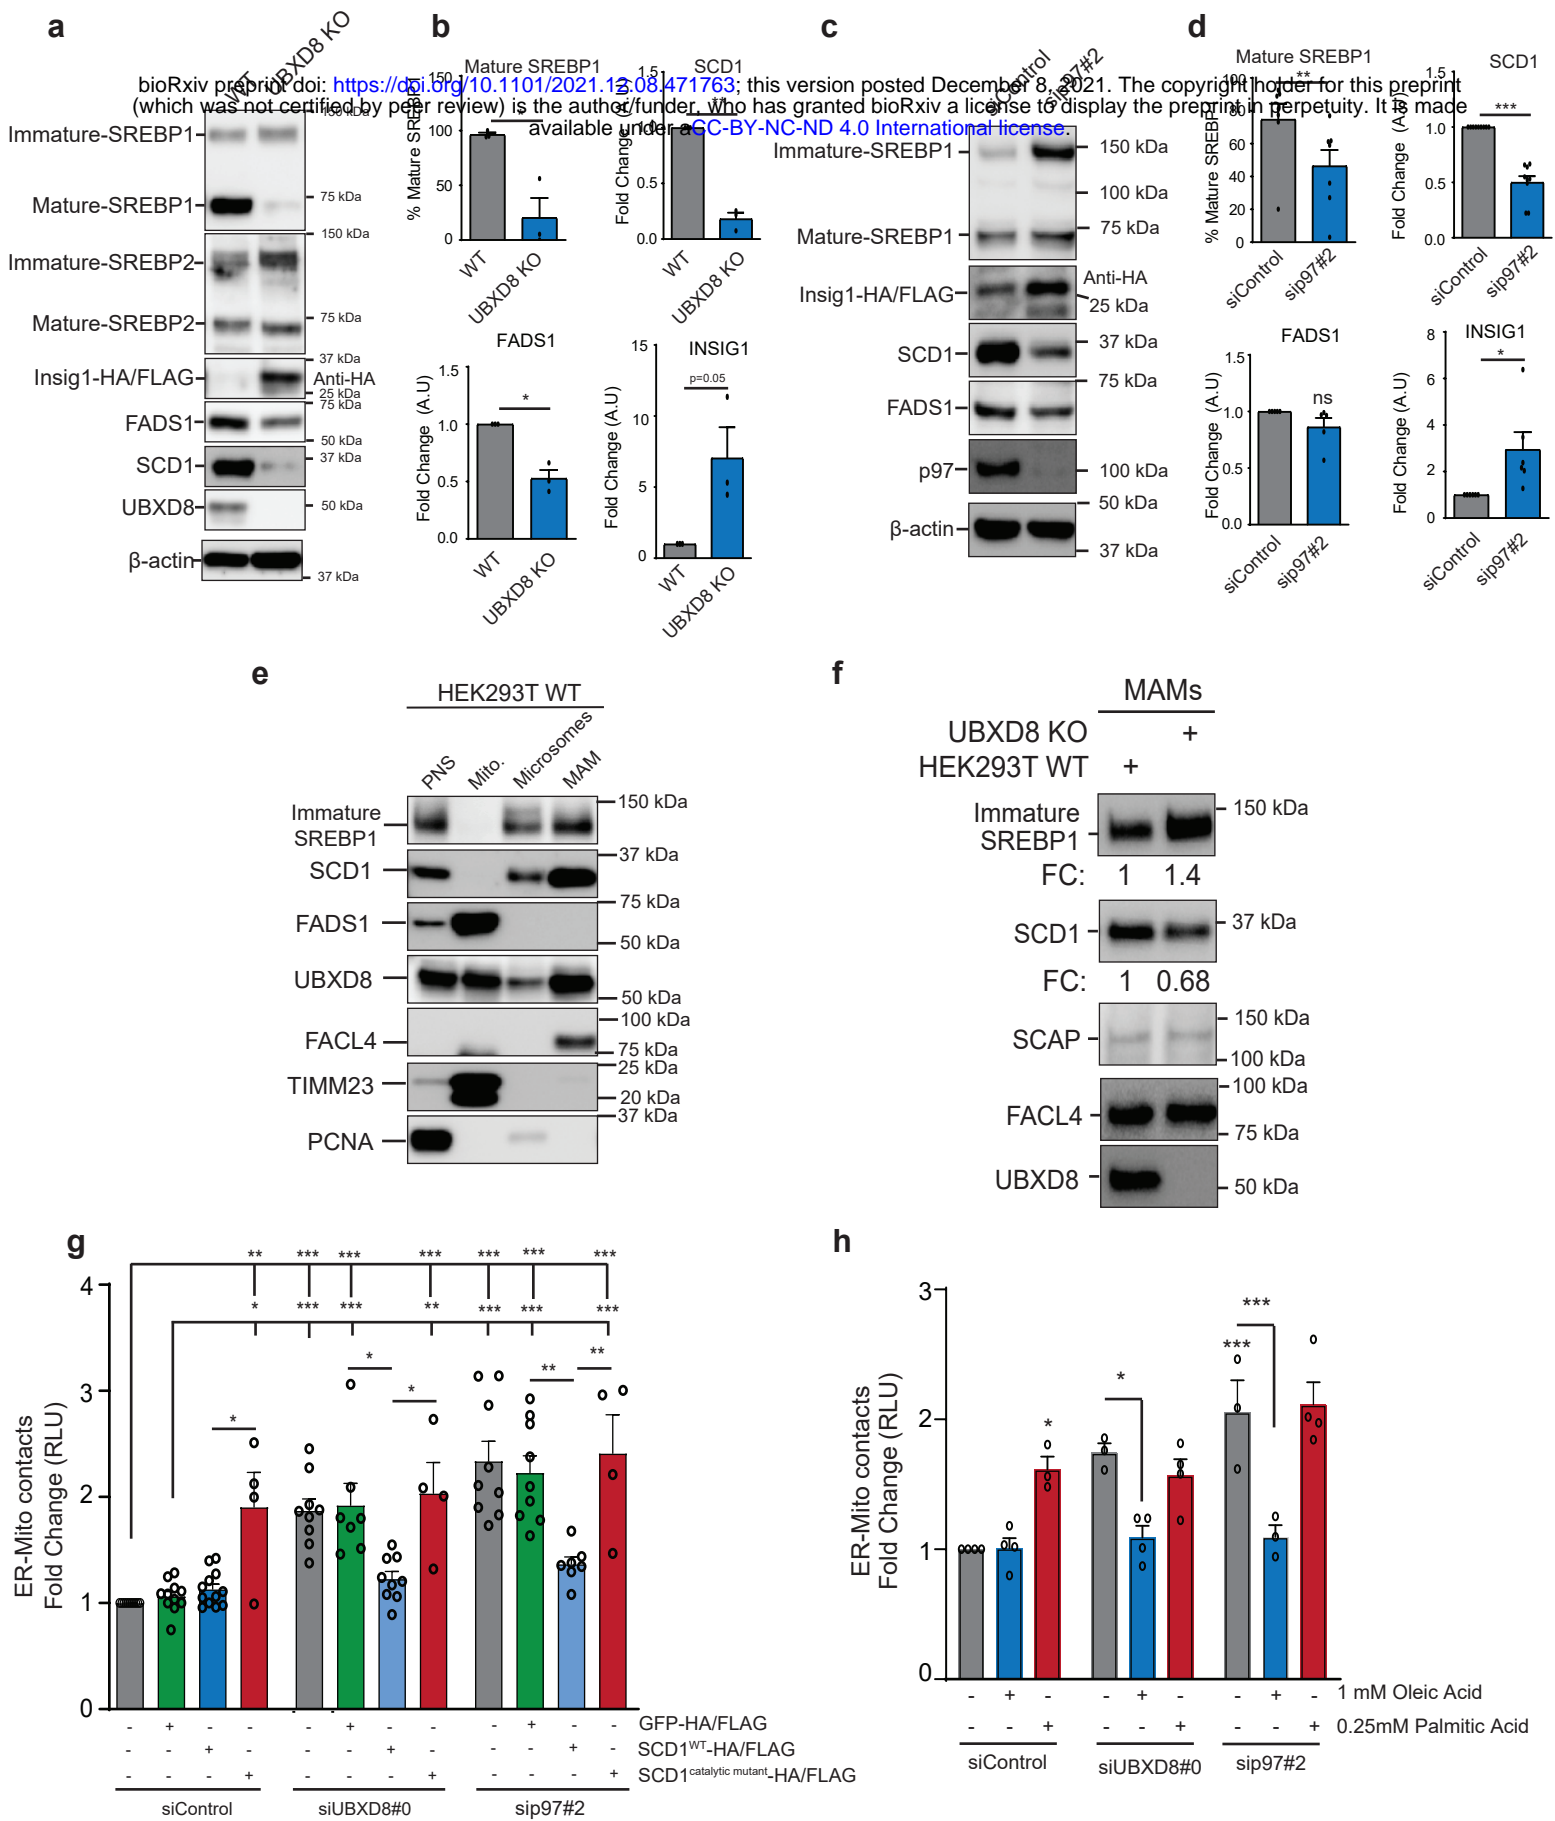

## Figure 4.

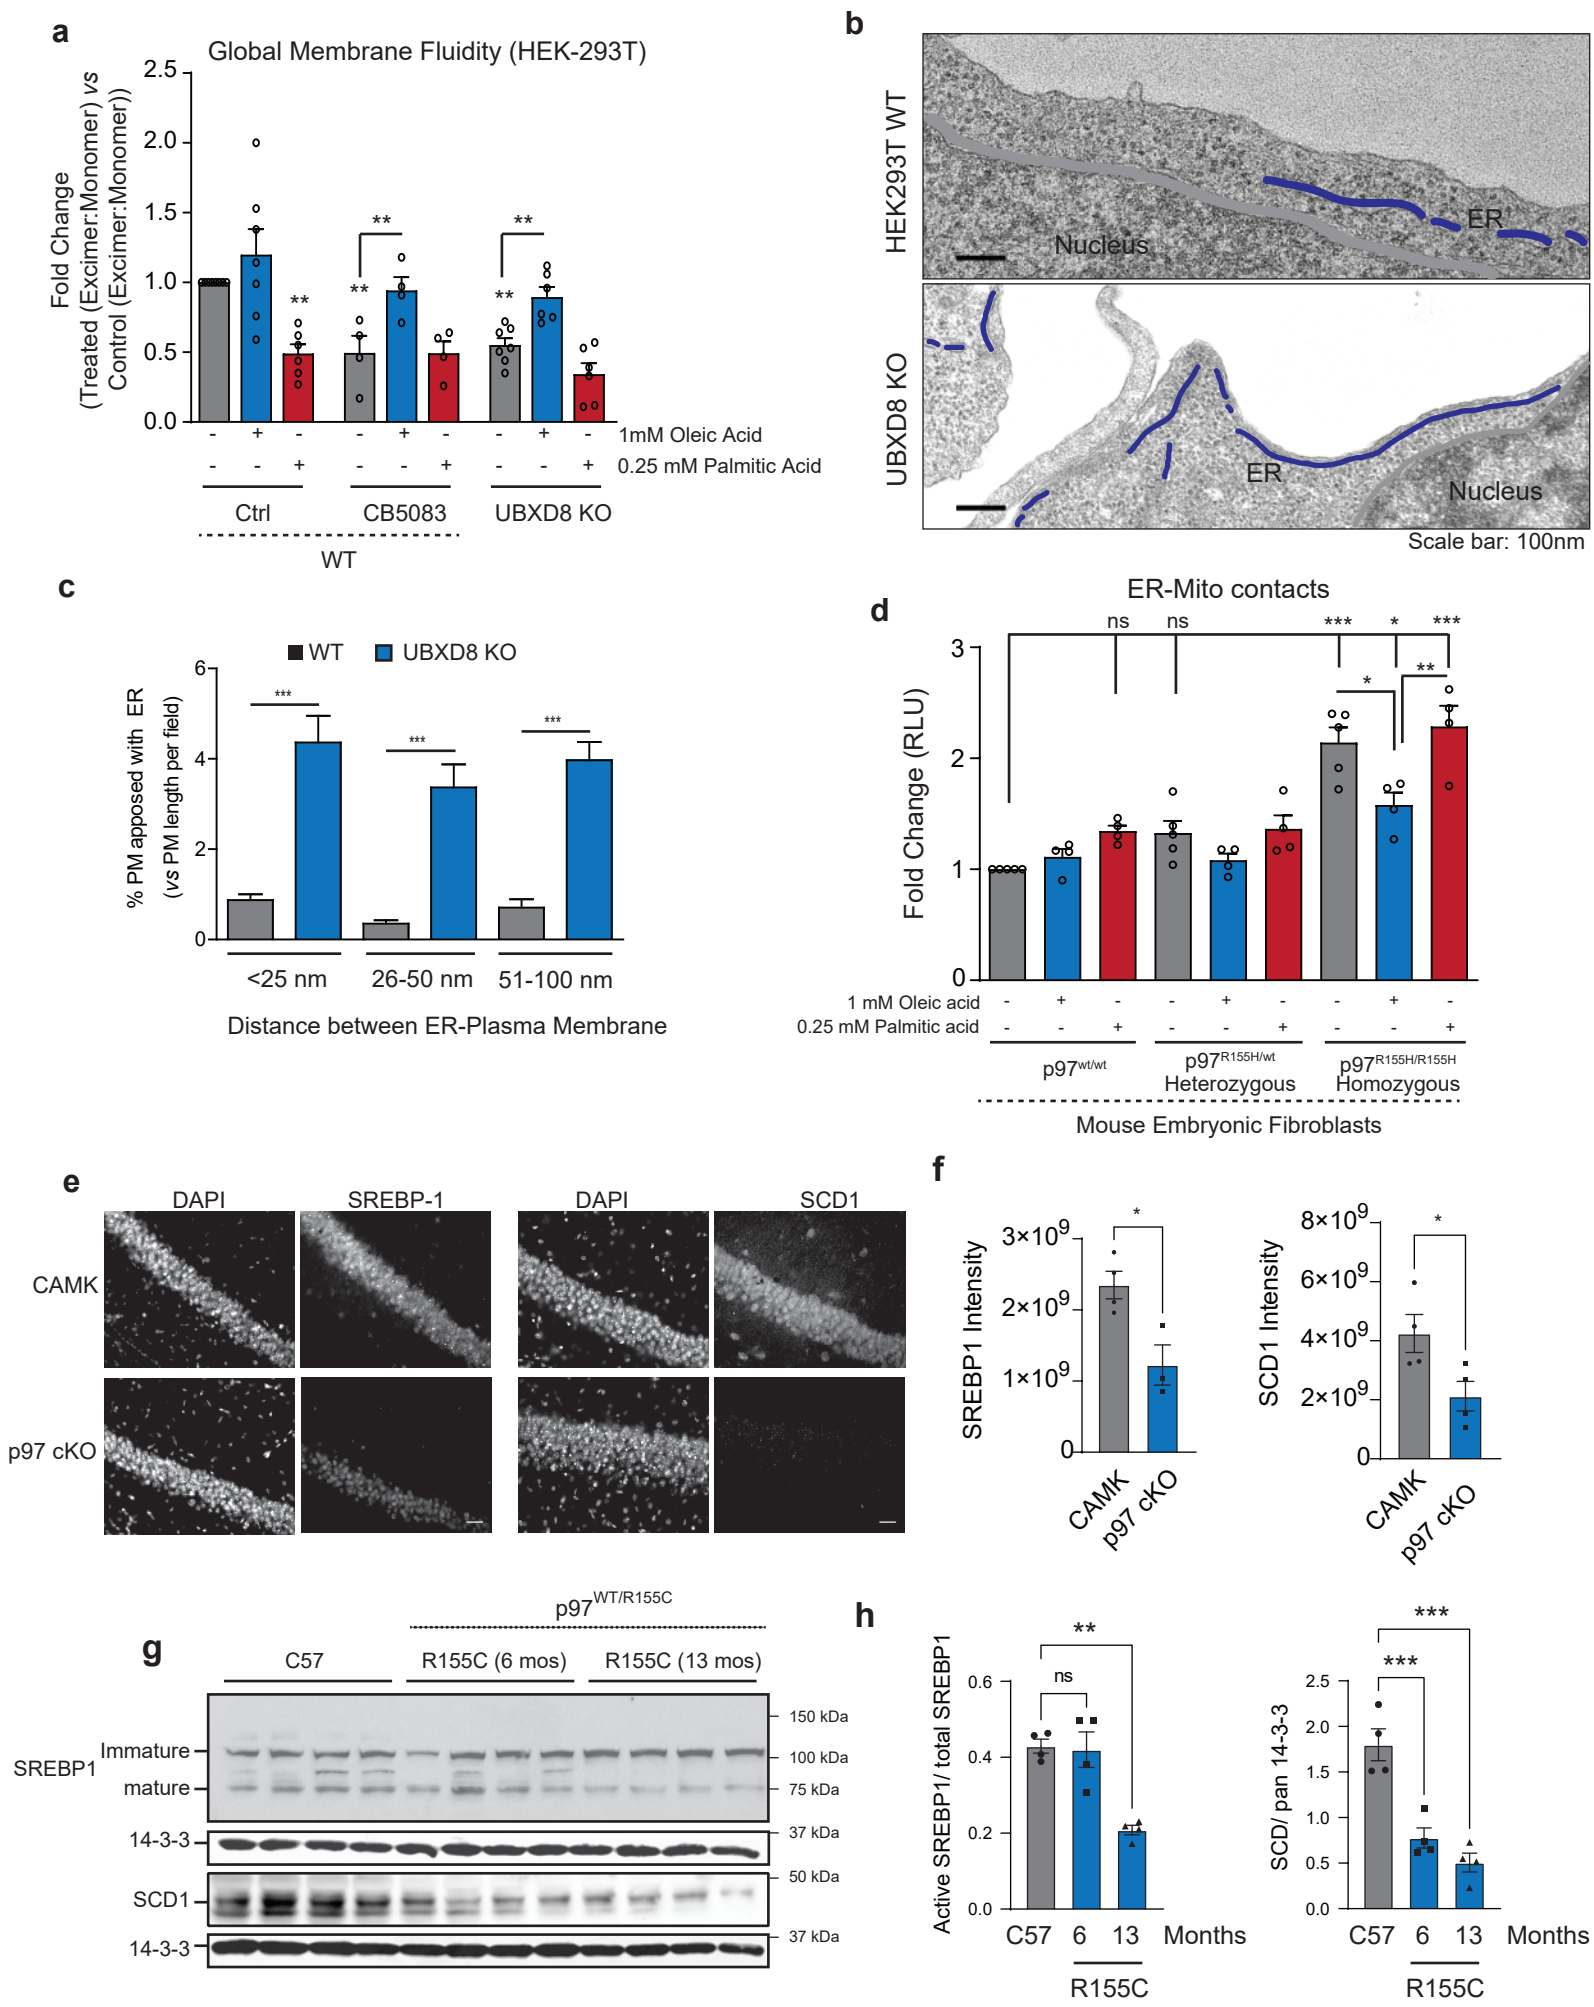

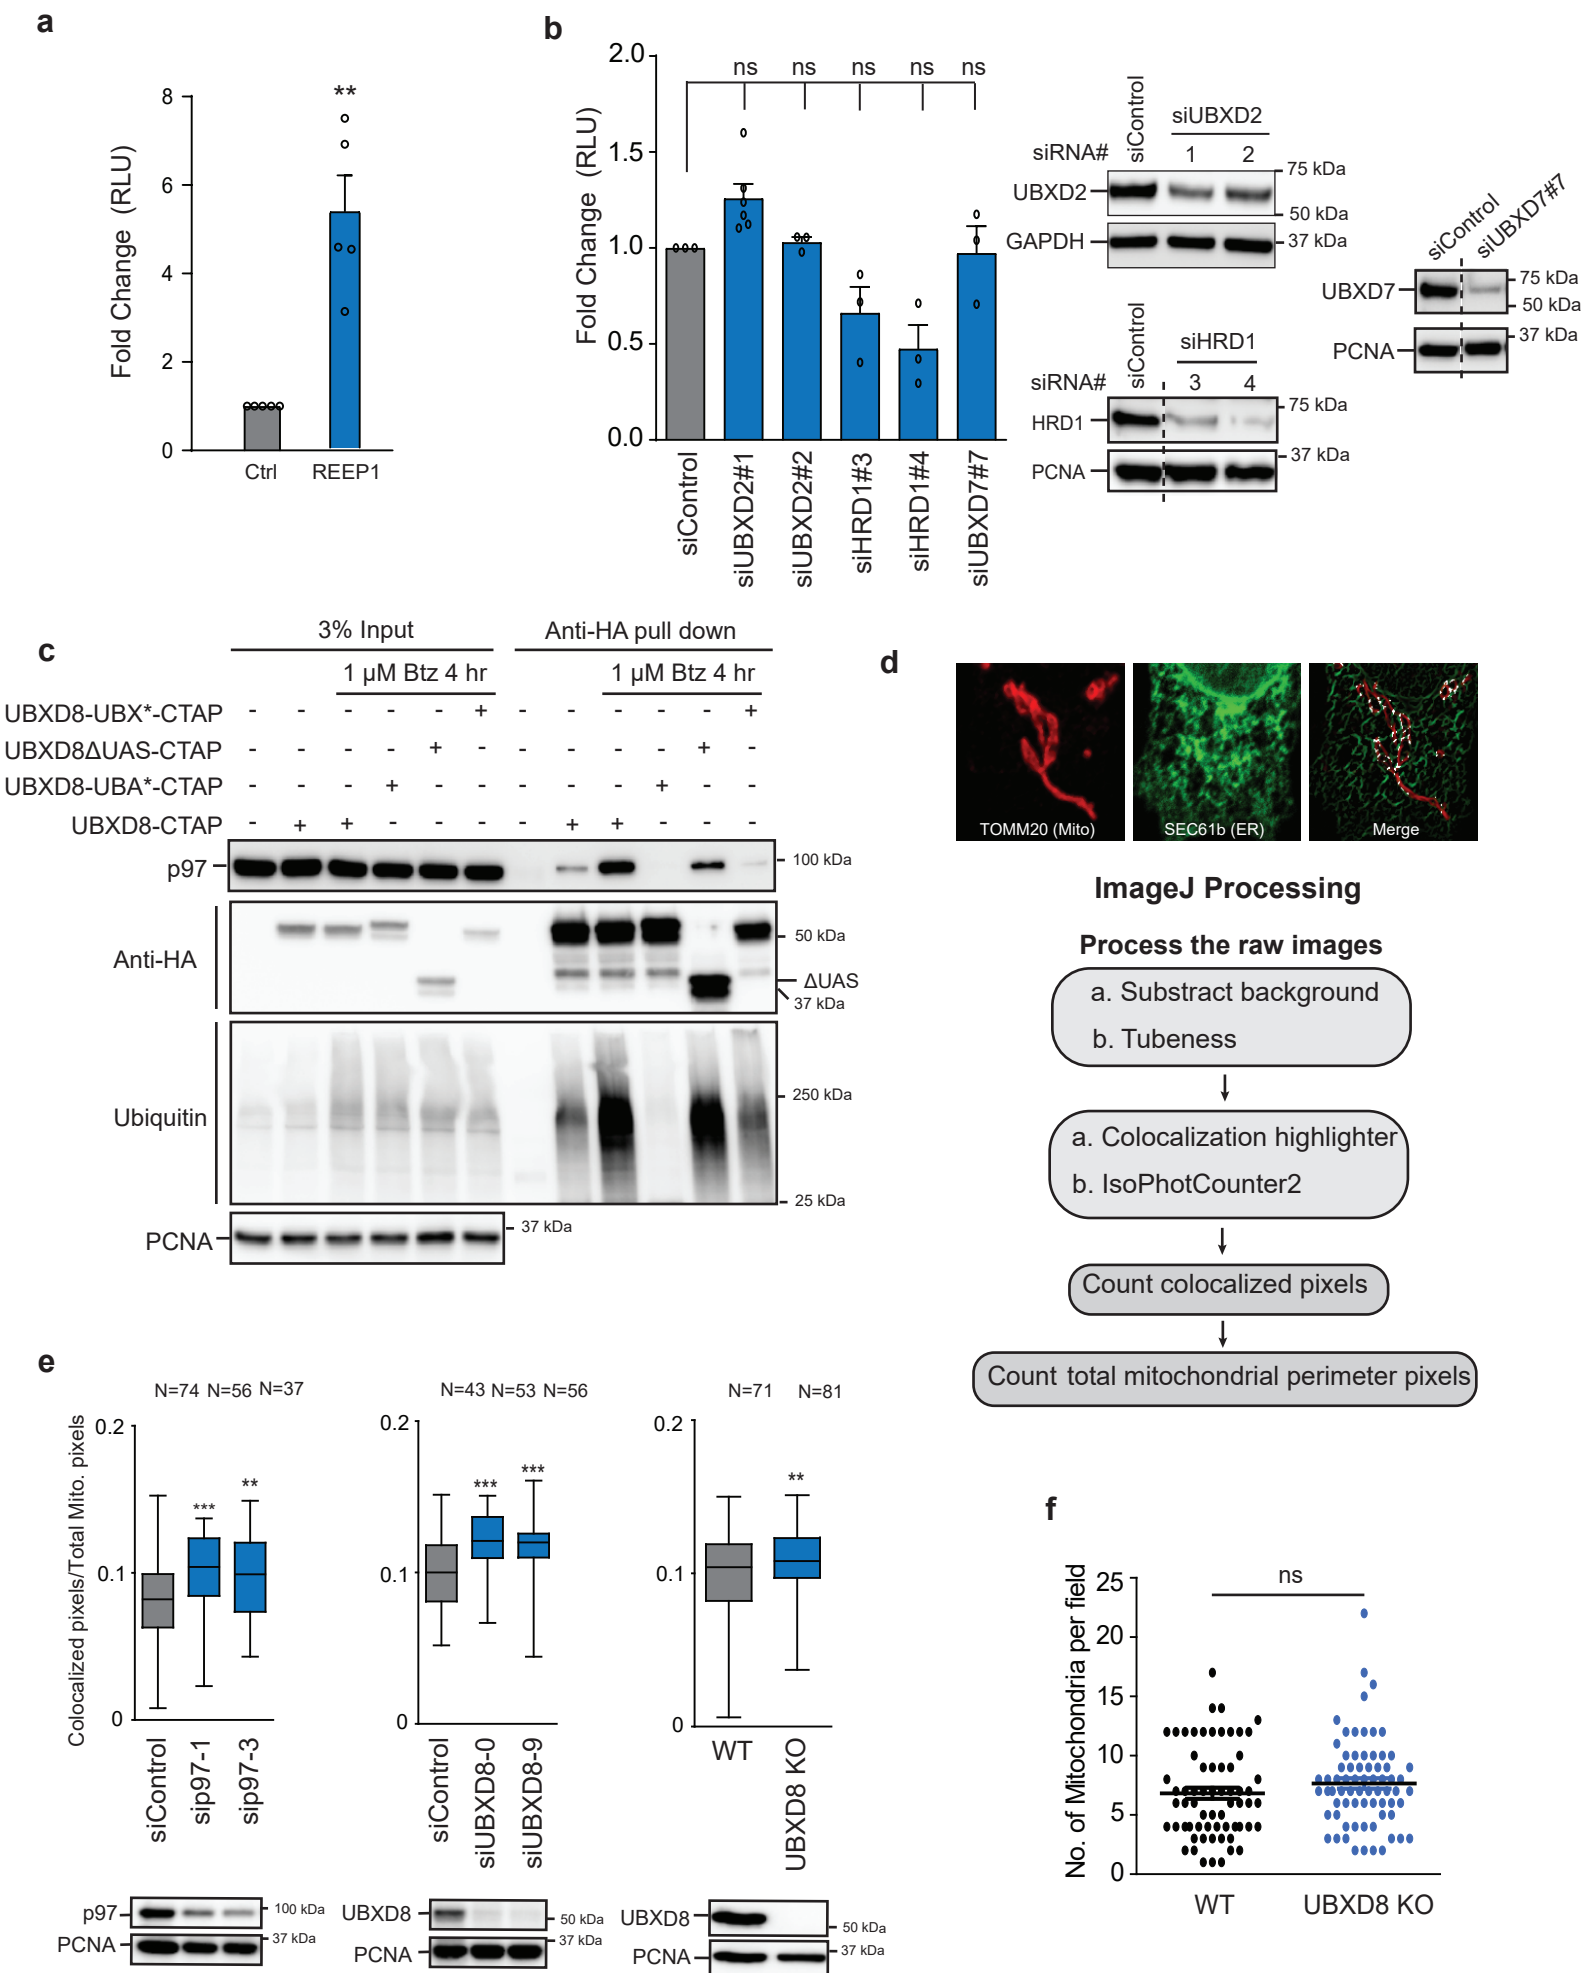

## Supplementary Figure 2

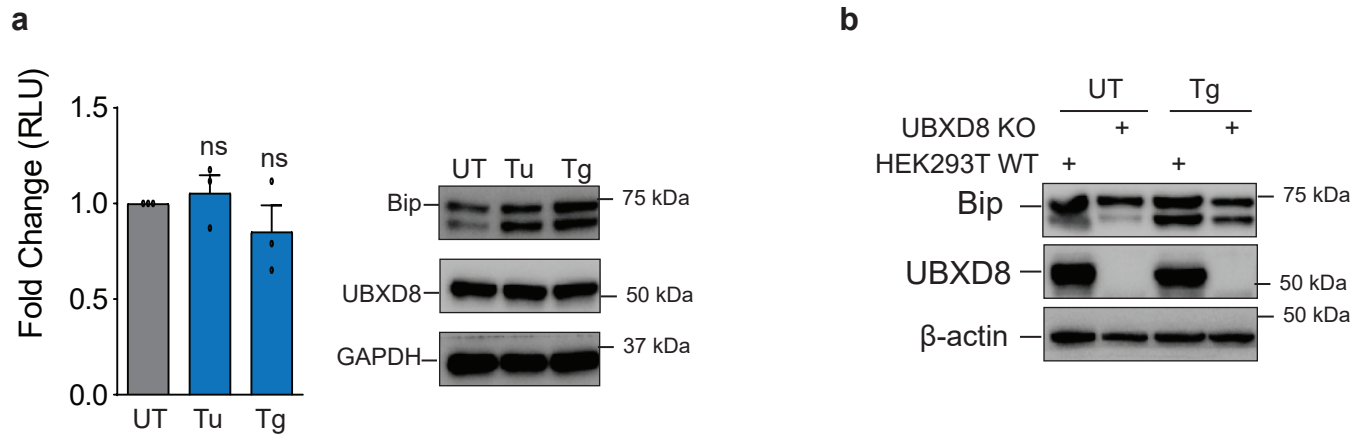

# Supplementary Figure 3.

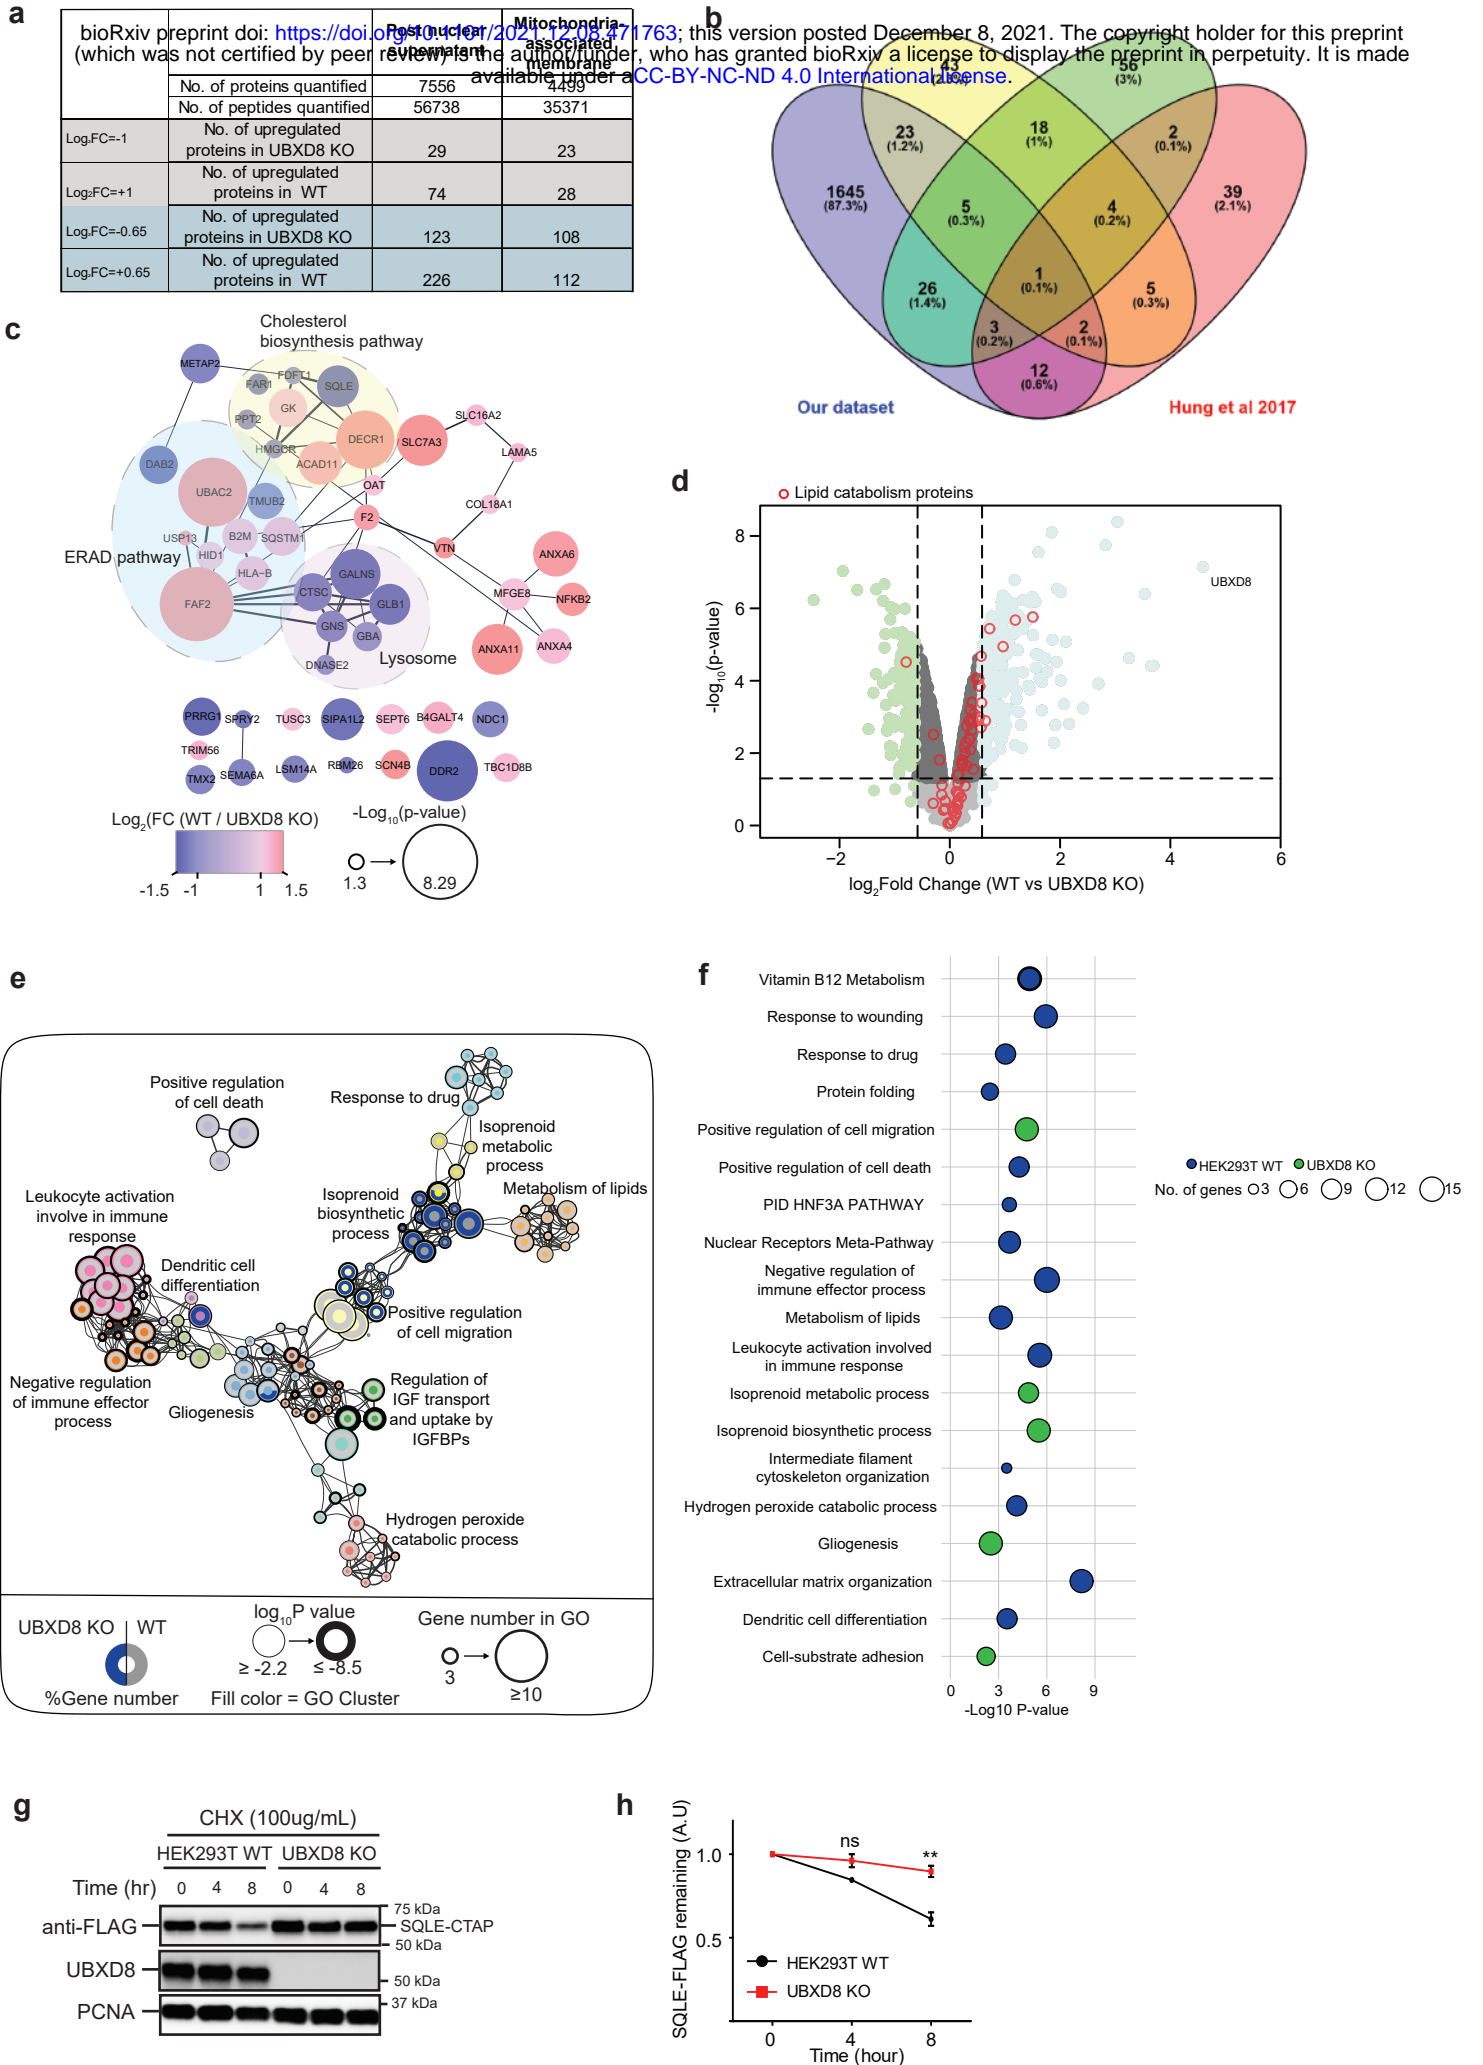

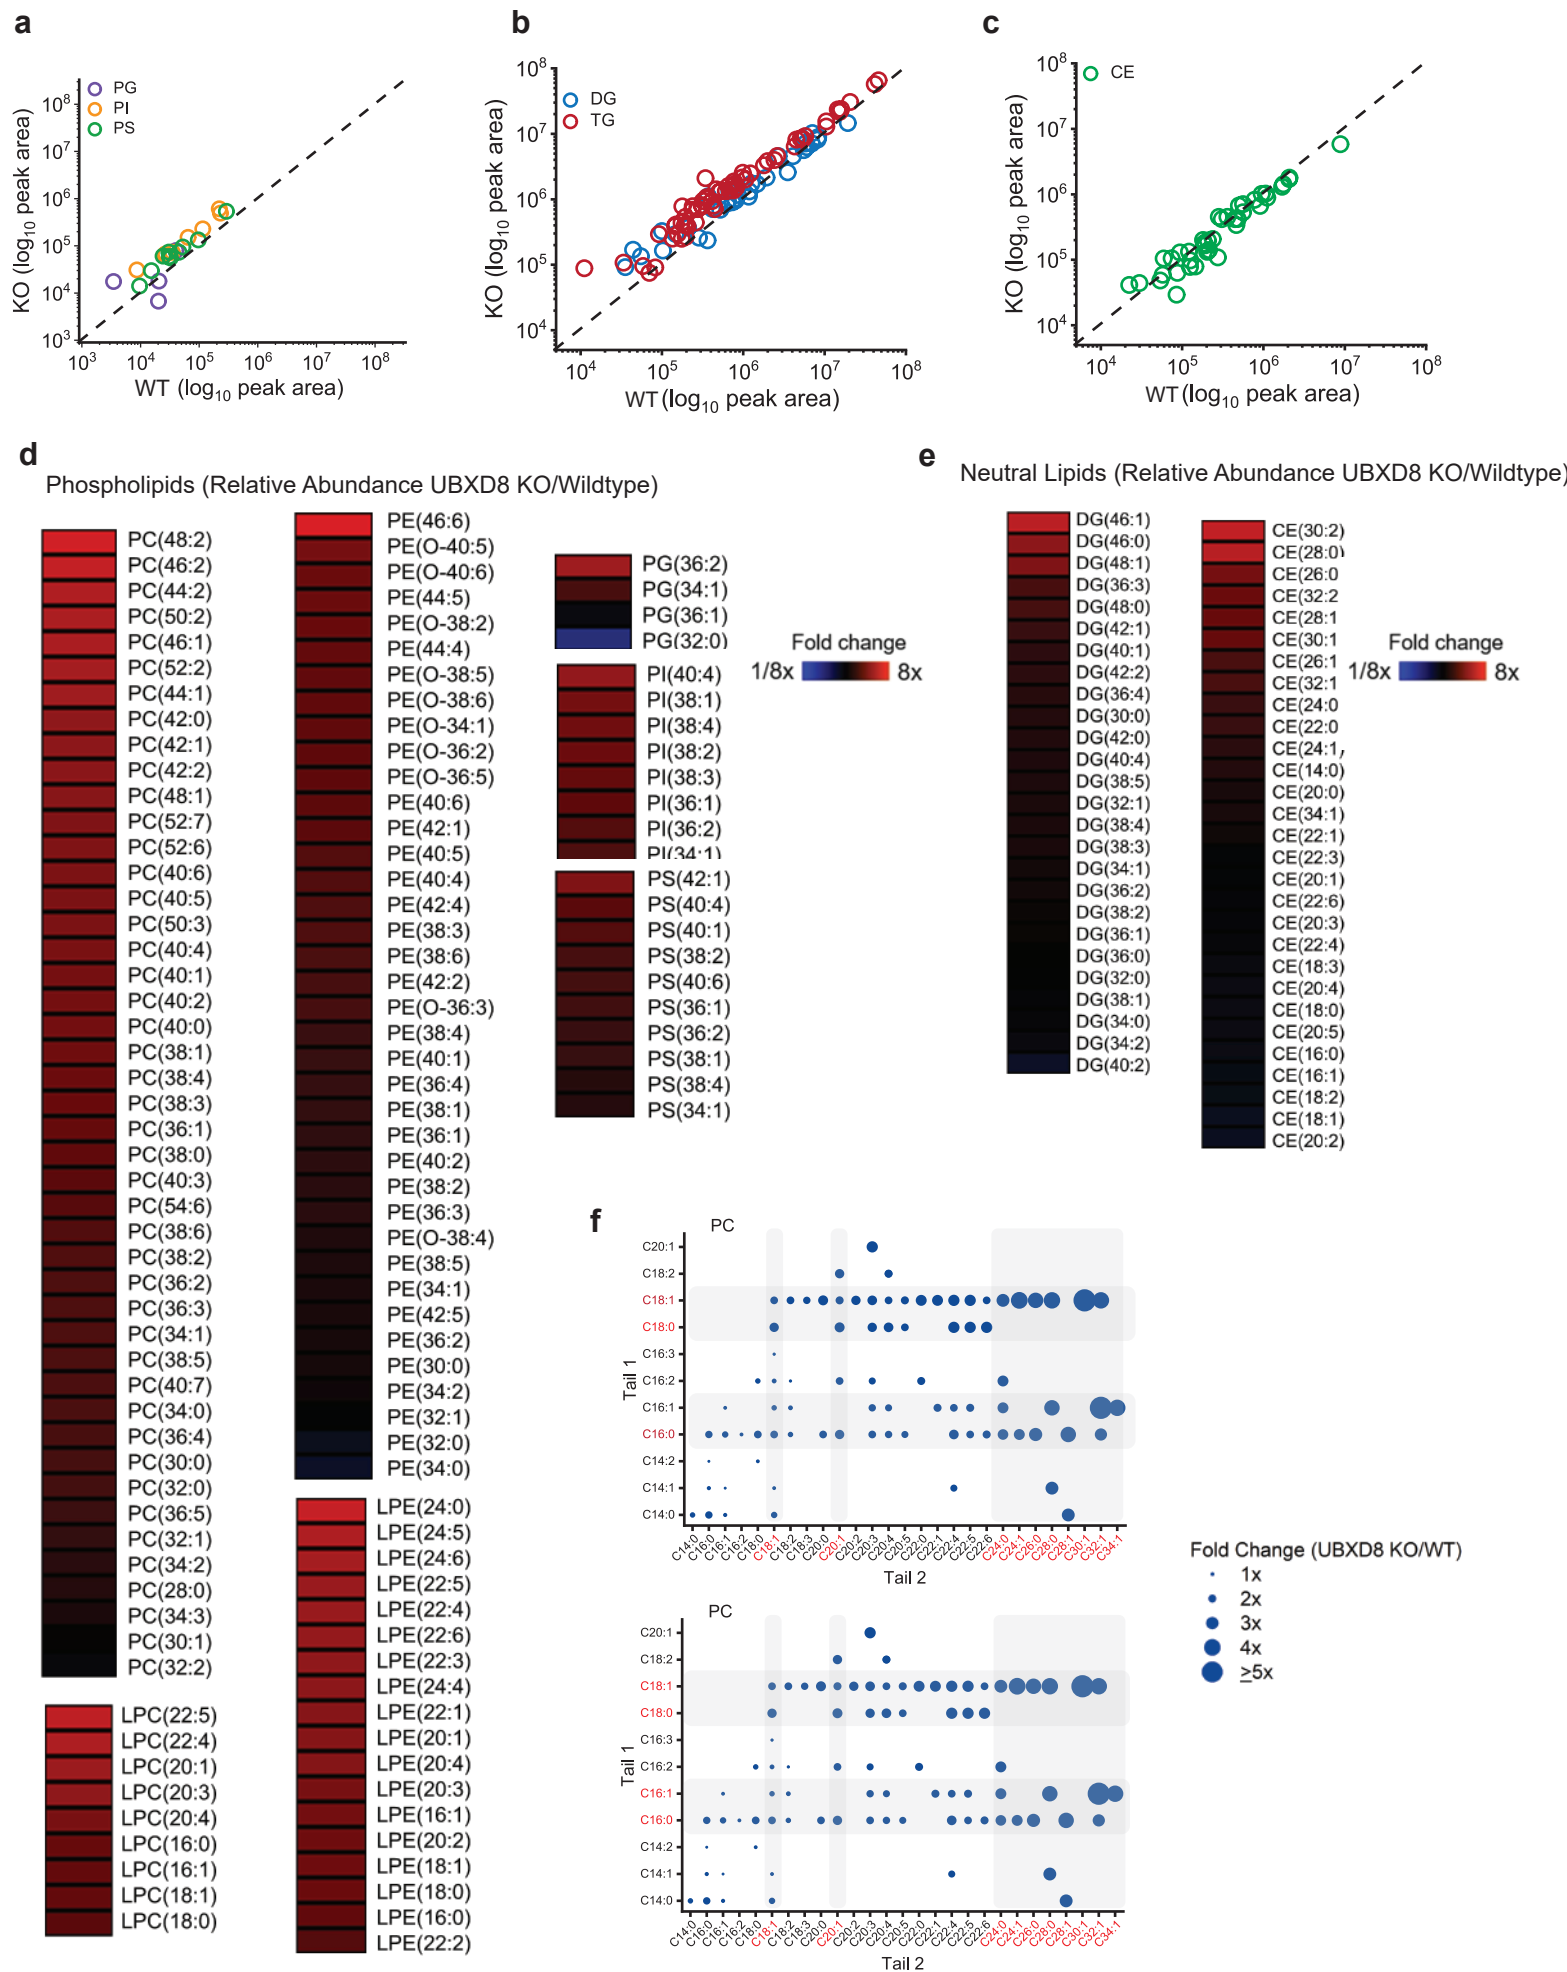

**Supplementary Figure 5.**

**a**

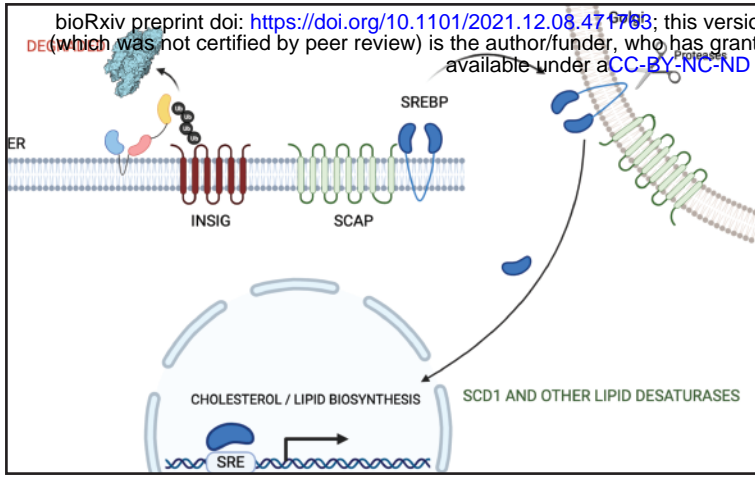

**b**

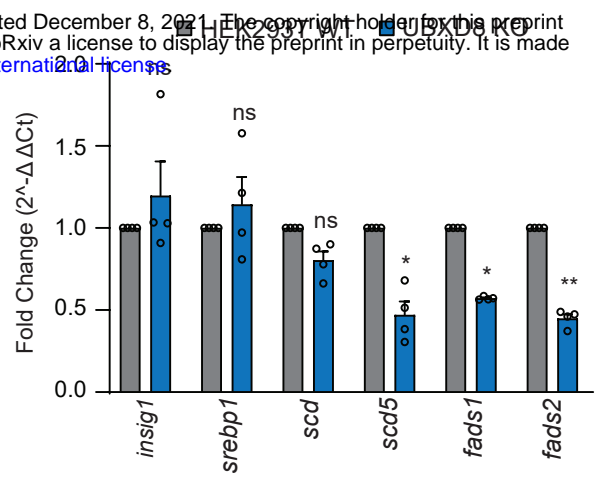

**c**

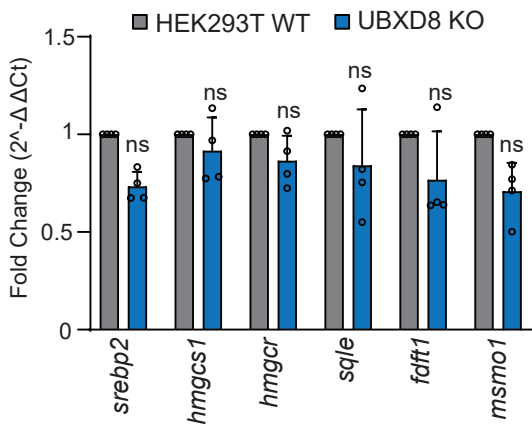

**d**

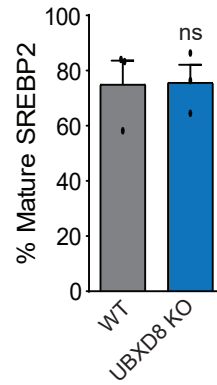

**e**

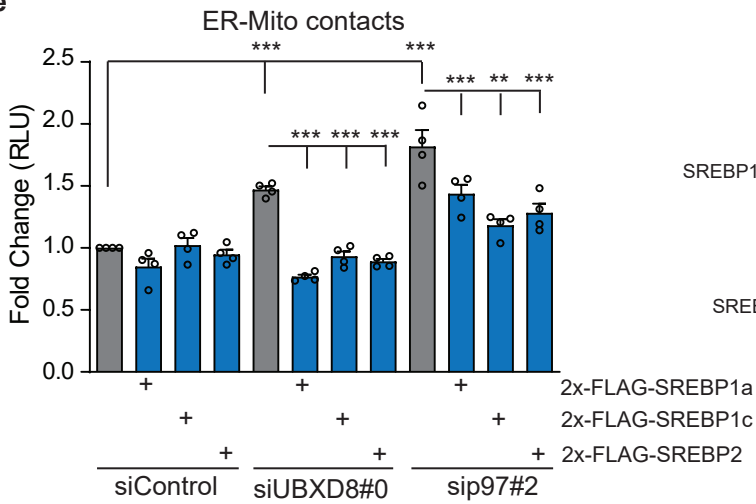

**f**

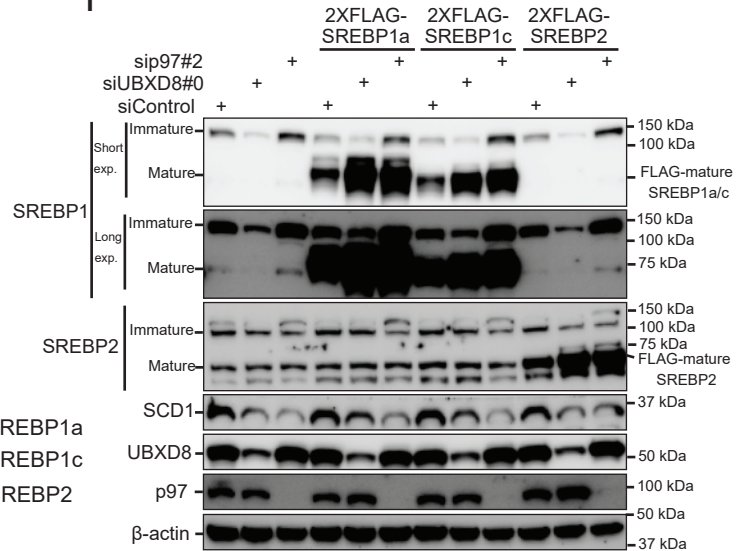

**g**

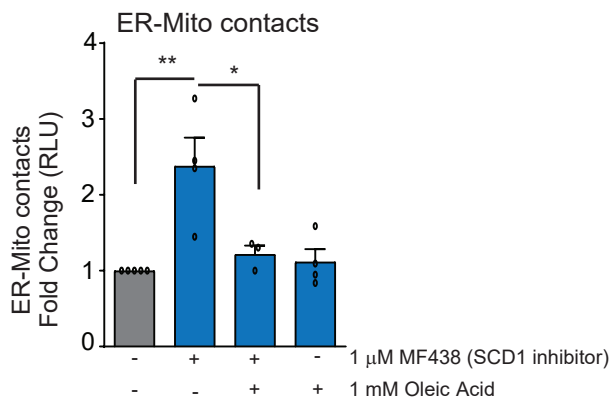

**h**

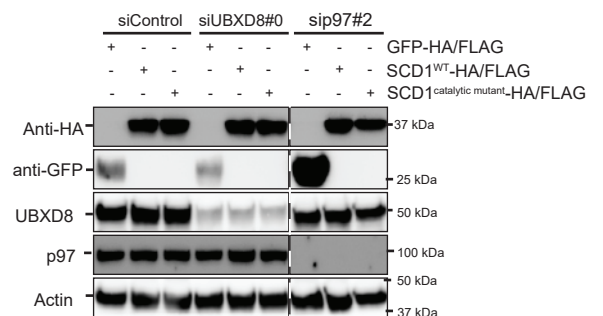

## Supplementary Figure 6.

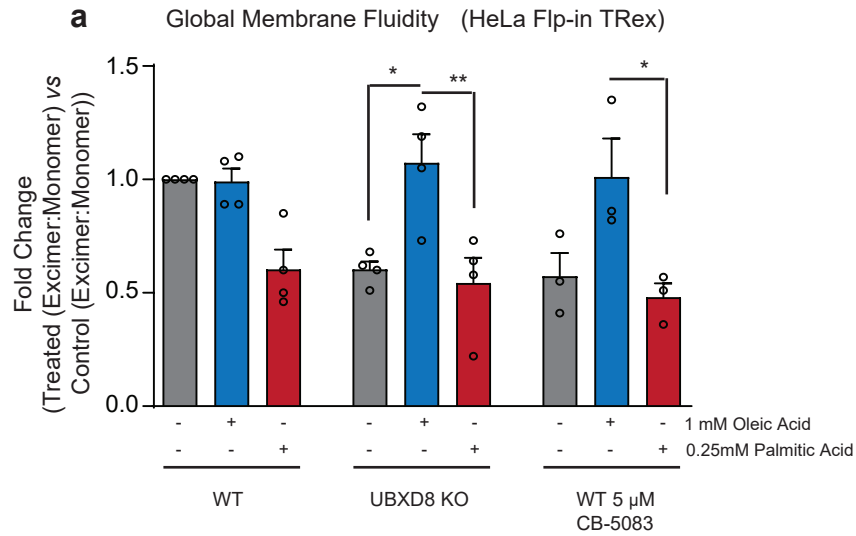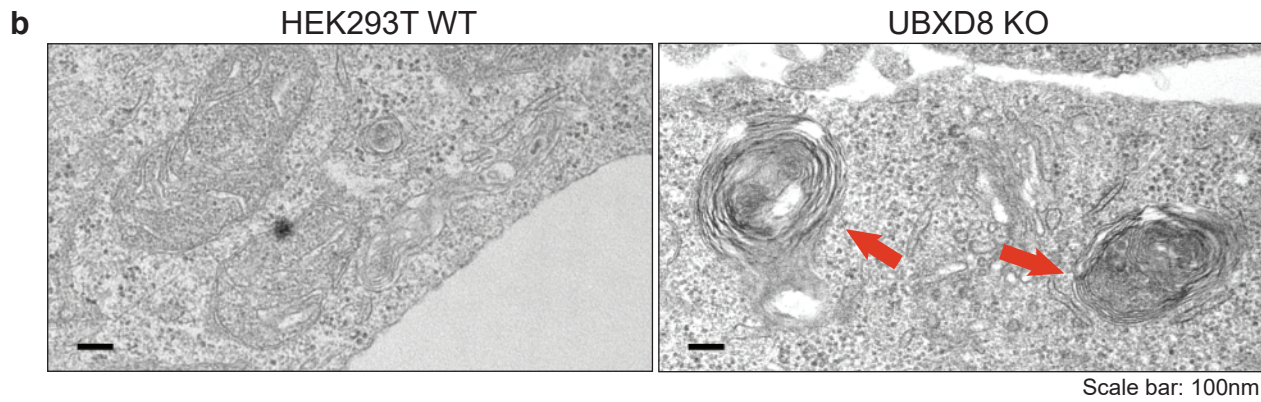

|            | Number of fields used for quantification | Total number of whorls | Percentage |
|------------|------------------------------------------|------------------------|------------|
| HEK293T WT | 65                                       | 4                      | 6.15%      |
| UBXD8 KO   | 122                                      | 40                     | 32.7%      |
